# Supplementary material for: Plasticity of histone modifications around Cidea and Cidec genes with secondary bile in the amelioration of developmentally-programmed hepatic steatosis
Source: PubMed Central journal article supplement (PMC6863835; doi:10.1038/s41598-019-52943-7), 2019-11-19
Supplement: 41598_2019_52943_MOESM1_ESM.pdf [file 41598_2019_52943_MOESM1_ESM.pdf]

**Plasticity of histone modifications around Cidea and Cidec genes with secondary bile in the amelioration of developmentally-programmed hepatic steatosis**

Urmi Jeenat Ferdous<sup>1</sup>, Hiroaki Itoh<sup>1</sup>, Keiko Muramatsu-Kato<sup>1</sup>, Yukiko Kohmura-Kobayashi<sup>1</sup>, Natsuyo Hariya<sup>2</sup>, Divyanu Jain<sup>1</sup>, Naoaki Tamura<sup>1</sup>, Toshiyuki Uchida<sup>1</sup>, Kazunao Suzuki<sup>1</sup>, Yoshihiro Ogawa<sup>3,4</sup>, Nobuaki Shiraki<sup>5</sup>, Kazuki Mochizuki<sup>6</sup>, Takeo Kubota<sup>7</sup>, Naohiro Kanayama<sup>1</sup>.

<sup>1</sup>Department of Obstetrics and Gynecology, Hamamatsu University School of Medicine, Hamamatsu, Japan;

<sup>2</sup>Department of Nutrition, Faculty of Health and Nutrition, Sciences, Yamanashi Gakuin University, Yamanashi, Japan;

<sup>3</sup>Department of Medicine and Bioregulatory Science, Graduate School of Medical Sciences, Kyushu University, Fukuoka, Japan;

<sup>4</sup>Department of Molecular and Cellular Metabolism, Graduate School of Medical and Dental Sciences, Tokyo Medical and Dental University, Tokyo, Japan;

<sup>5</sup>Department of Life Science and Technology, School of Life Science and Technology, Tokyo Institute of Technology, Yokohama, Japan;

<sup>6</sup>Laboratory of Food and Nutritional Sciences, Department of Local Produce and Food Sciences, Faculty of Life and Environmental Sciences, University of Yamanashi, Yamanashi, Japan;

<sup>7</sup>Faculty of Child Studies, Seitoku University, Matsudo, Japan.

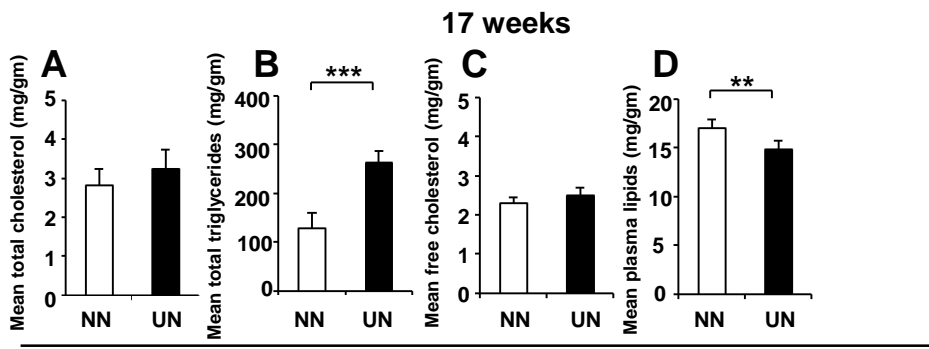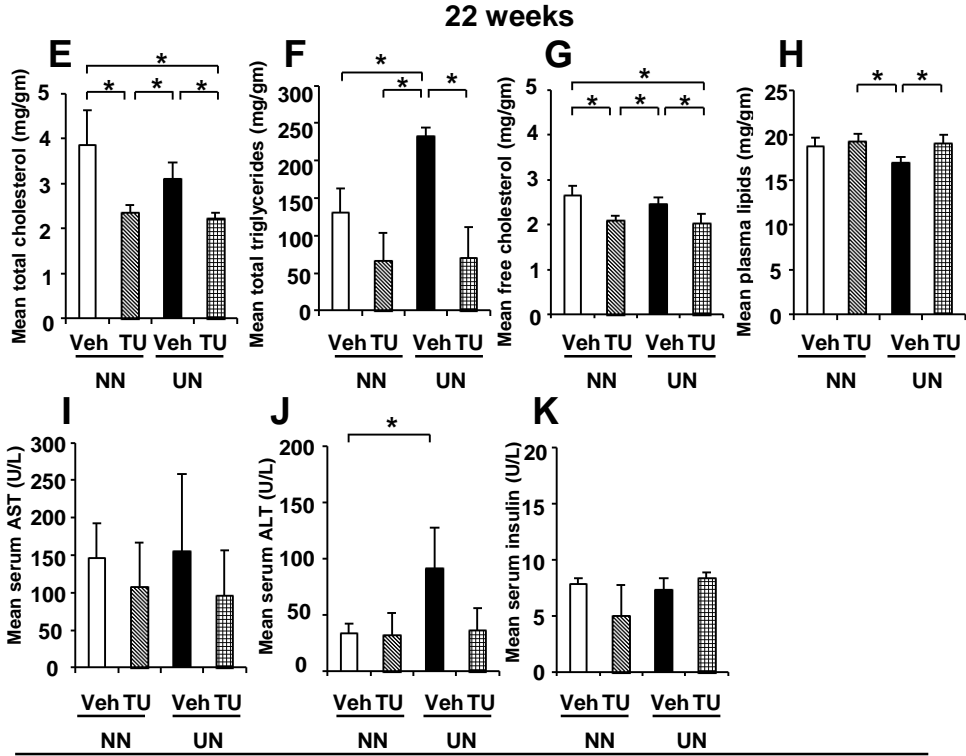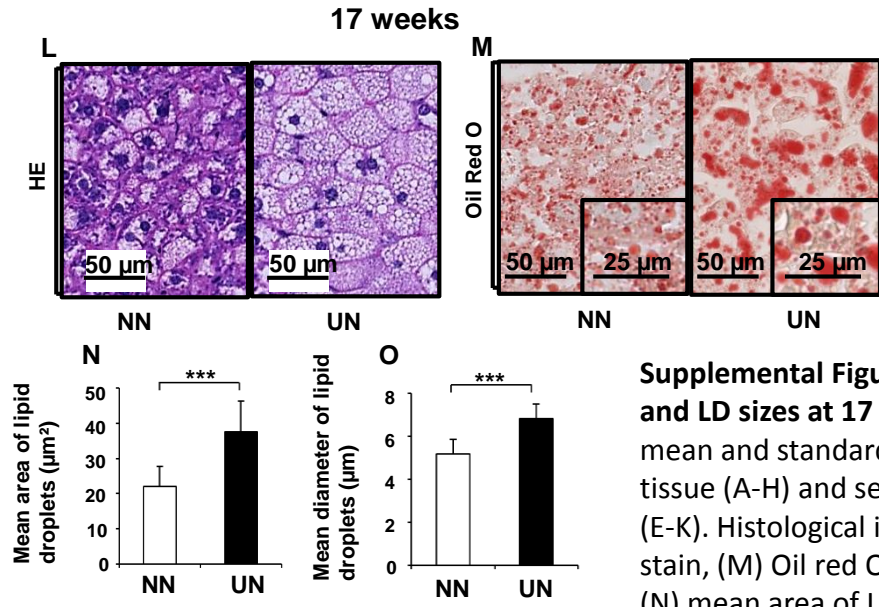

**Supplemental Figure S1. Tissue and serum lipid profiles and LD sizes at 17 weeks.** Bars and error bars indicate the mean and standard deviations of lipid profiles from liver tissue (A-H) and serum (I-K) in cohort 2 (A-D) and cohort 3 (E-K). Histological image under x40 magnification; (L) HE stain, (M) Oil red O stain (inset with  $\times 80$  magnification), (N) mean area of LD, (O) mean diameter of LD with error bars indicating SD. Significance was observed by the Student's t-test (A-D, N, O) and Steel-Dwass test (E-K) (P values were stated as  $p^* < 0.05$ ,  $p^{**} < 0.01$ , and  $p^{***} < 0.001$ ).

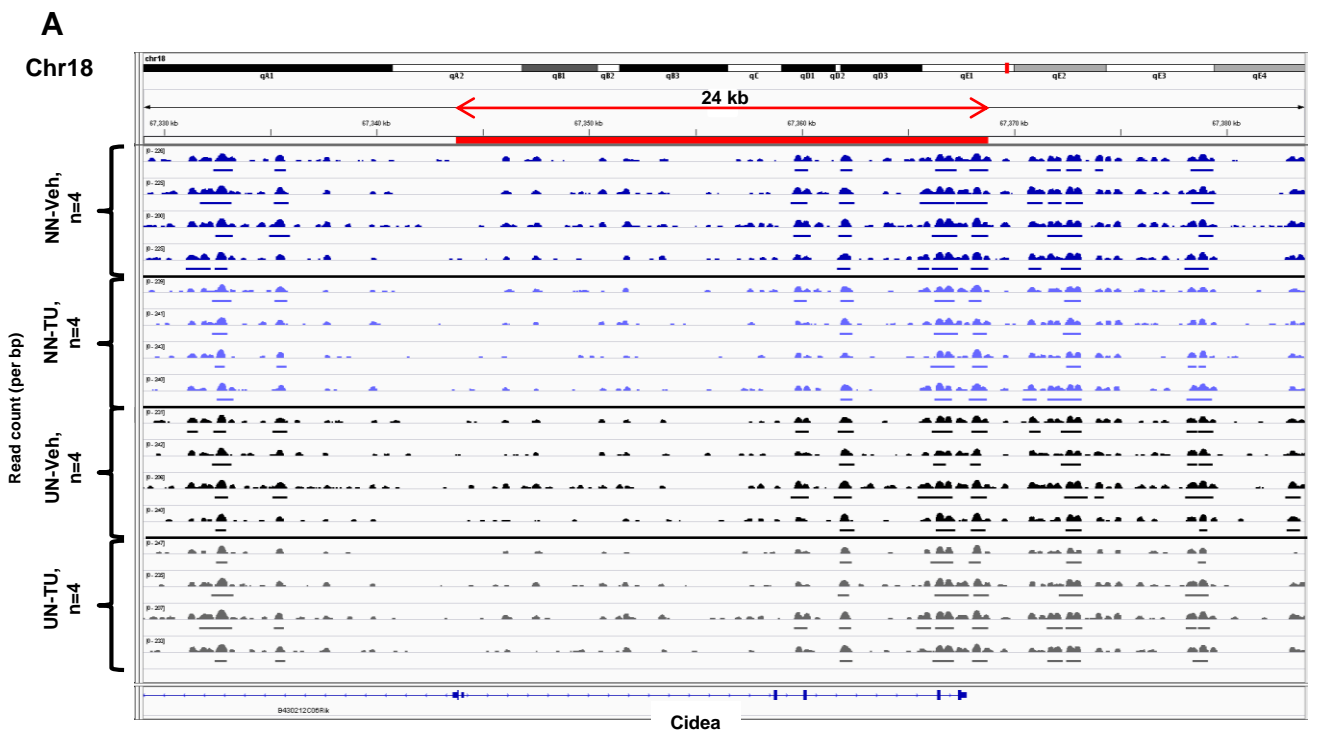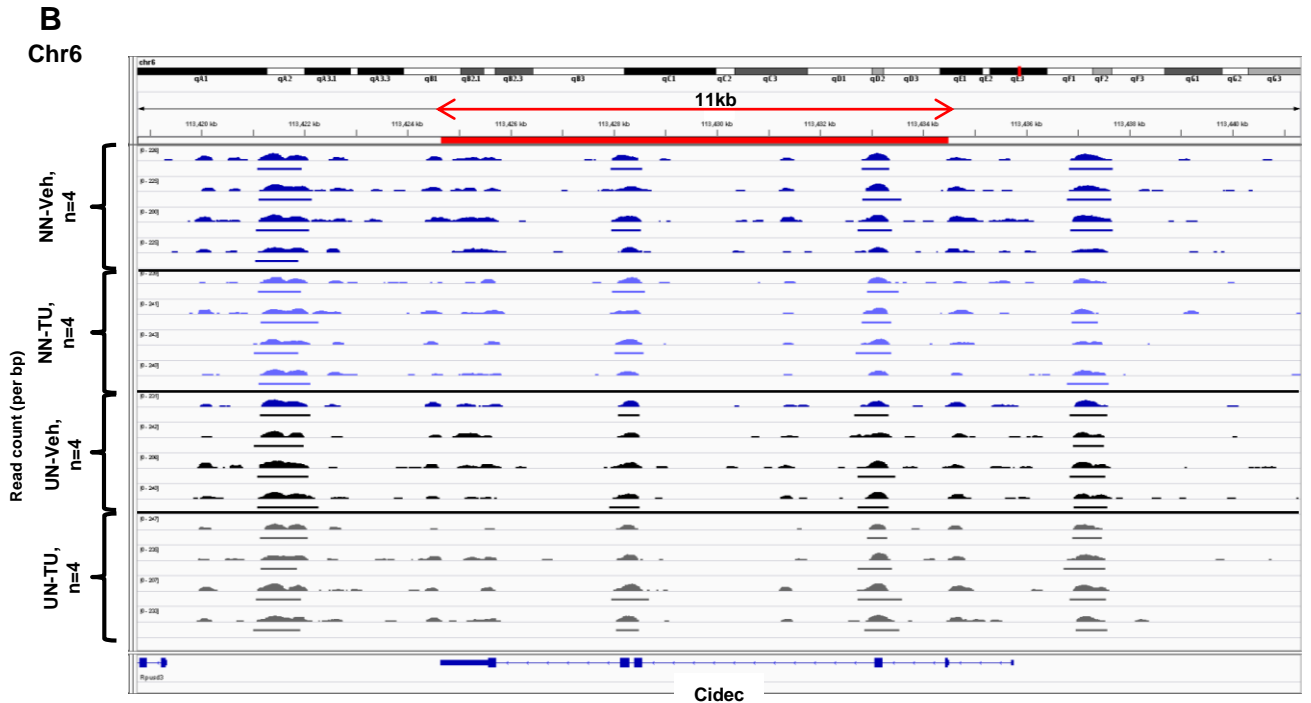

**Supplemental Figure S2. Exploratory comparison of MBD-seq data of Cidea and Cidec genes including up- and downstream regions.**

A visual comparison of MBD-seq is shown among four groups (NN-Veh; n=4, NN-TU; n=4, UN-Veh; n=4, and UN-TU; n=4). The top row shows the locations of Cidea (A) and Cidec (B) in chromosomes 18 (length of 24 kb) and 6 (length of 11 kb) respectively, and methylation peaks with transcription factor-binding site. Protein coding region marked by red bold line and double arrow. Peaks are color coded as blue, purple, black, and gray for NN-Veh, NN-TU, UN-Veh, and UN-TU, respectively, for clarity. No significant differences were observed in methylation peaks on DNA methylation around entire Cidea gene and entire Cidec gene among the four groups including promoter region.

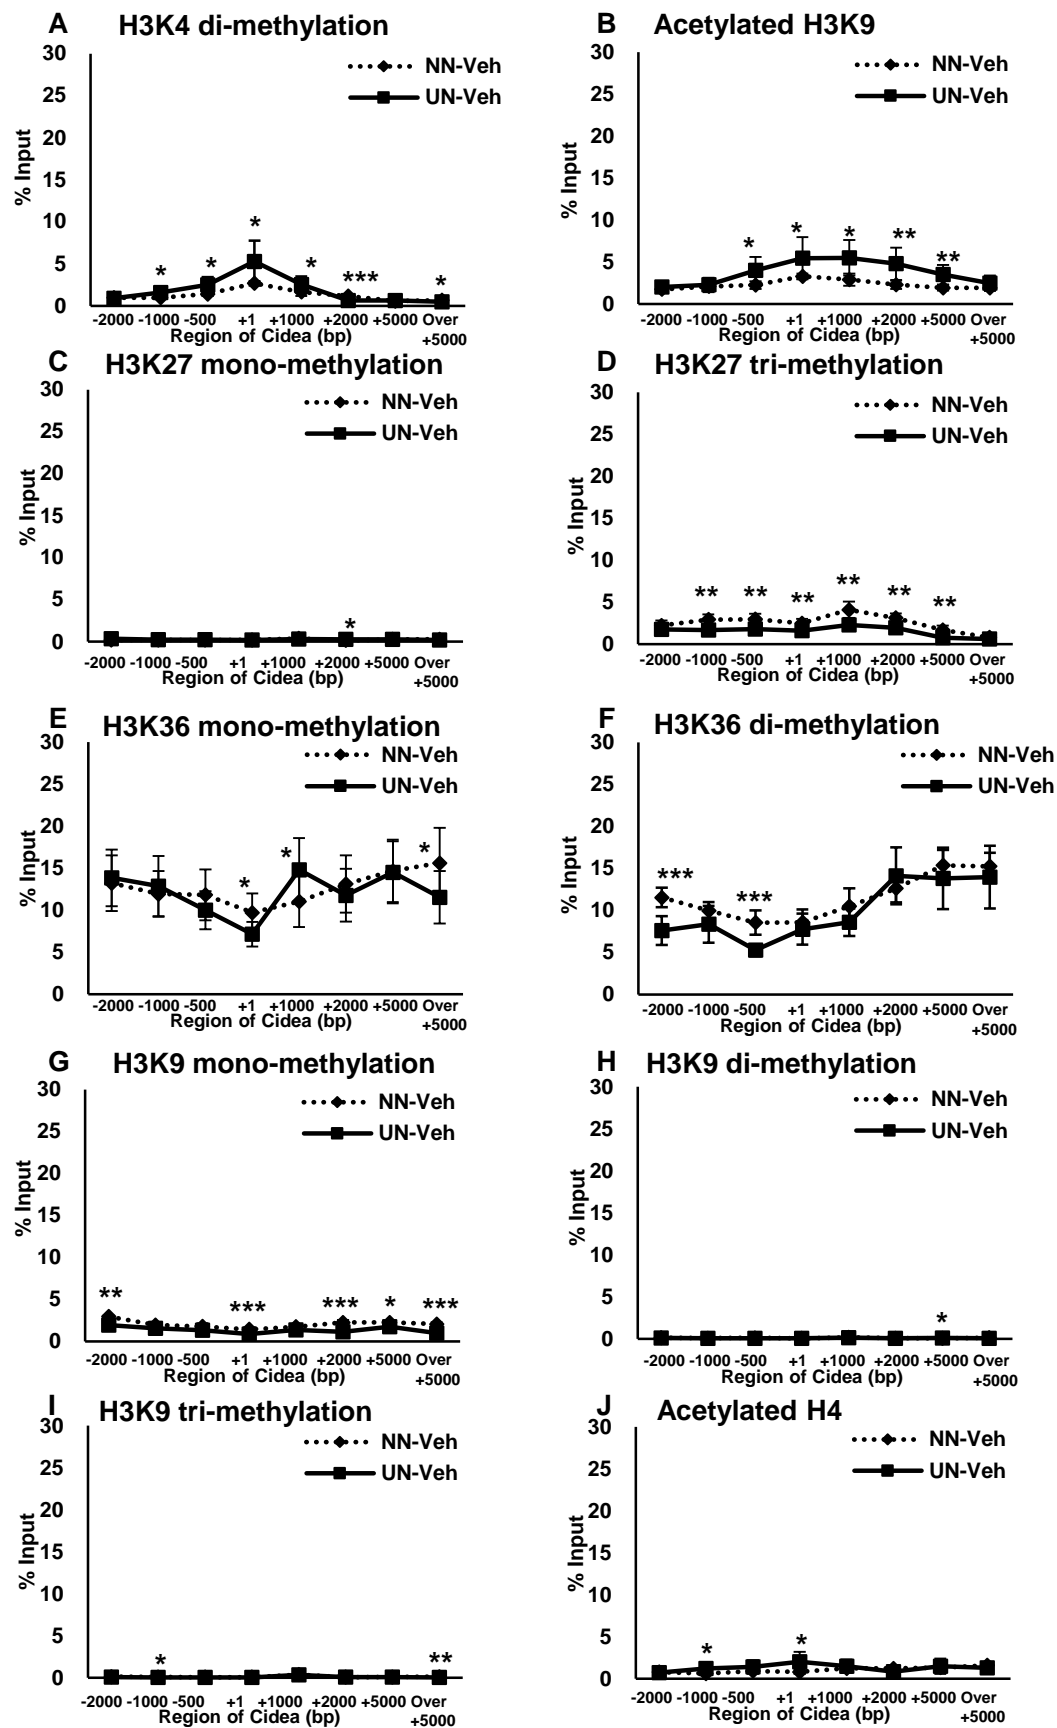

**Supplemental Figure S3. Histone modifications around Cidea by ChIP assays in UN *in utero*.** Mean values are expressed with SD with error bars ( $p^* < 0.05$ ,  $p^{**} < 0.01$ ,  $p^{***} < 0.001$ ), with the Student's t-test or Mann-Whitney U test as appropriate. The X-axis shows the region of gene length and the y-axis is % input.

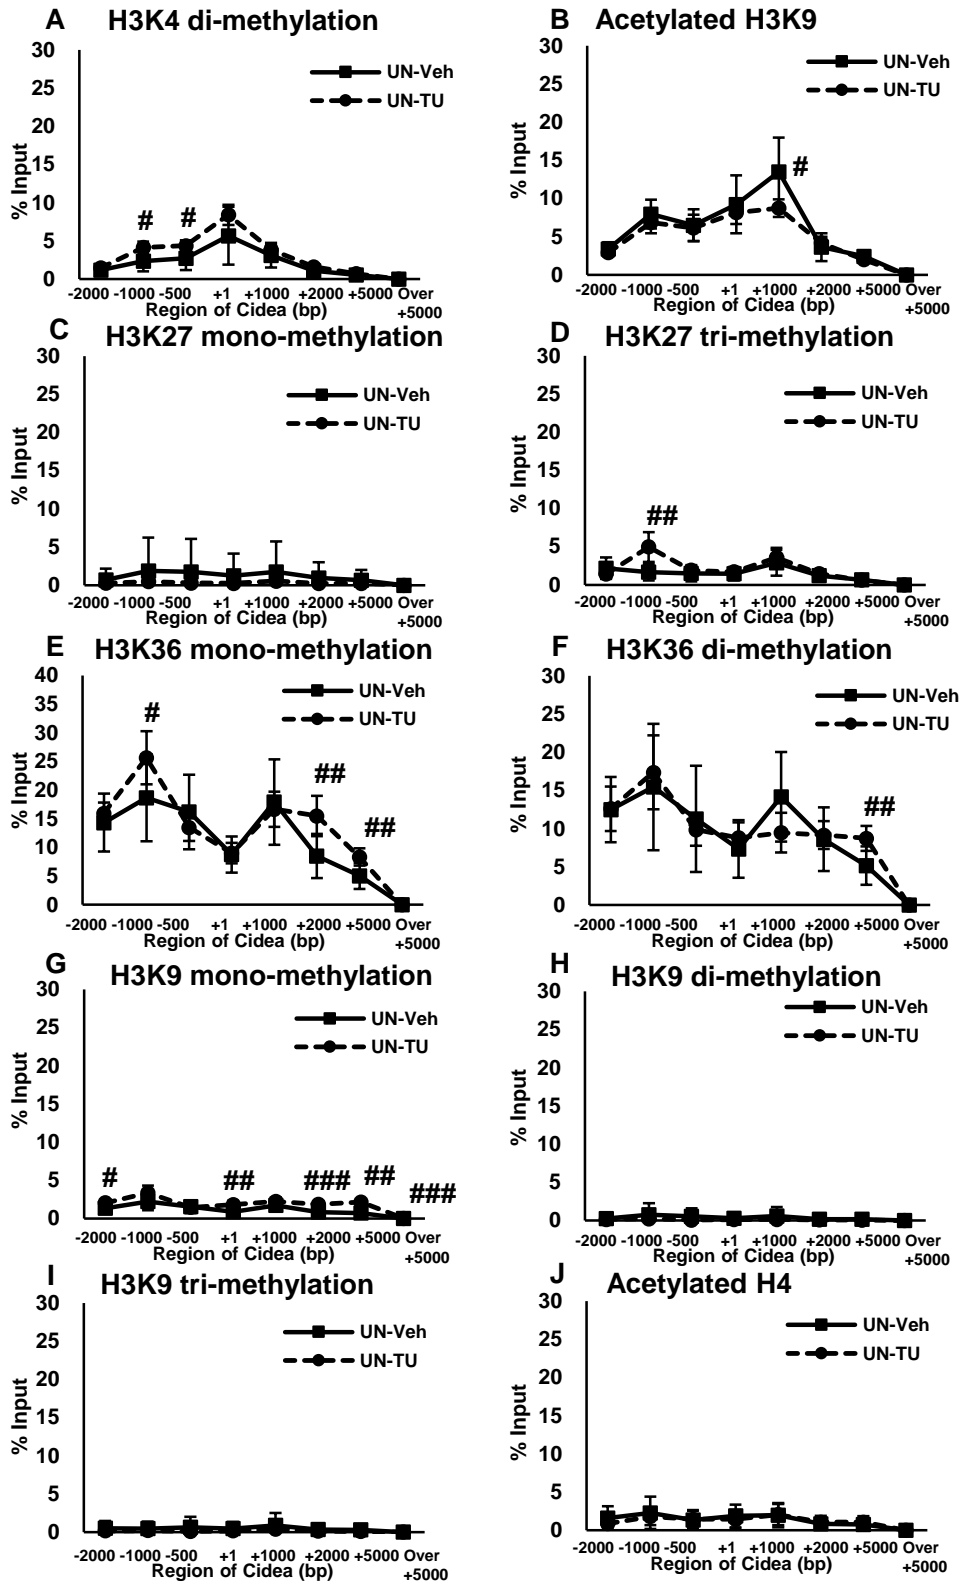

**Supplemental Figure S4. Histone modifications around Cidea by ChIP assays in UN *in utero* after the TUDCA treatment.** Mean values are expressed with SD with error bars ( $p\# < 0.05$ ,  $p\## < 0.01$ ,  $p\### < 0.001$ ), with the Student's t-test or Mann-Whitney U test as appropriate. The X-axis shows the region of gene length and the y-axis is % input.

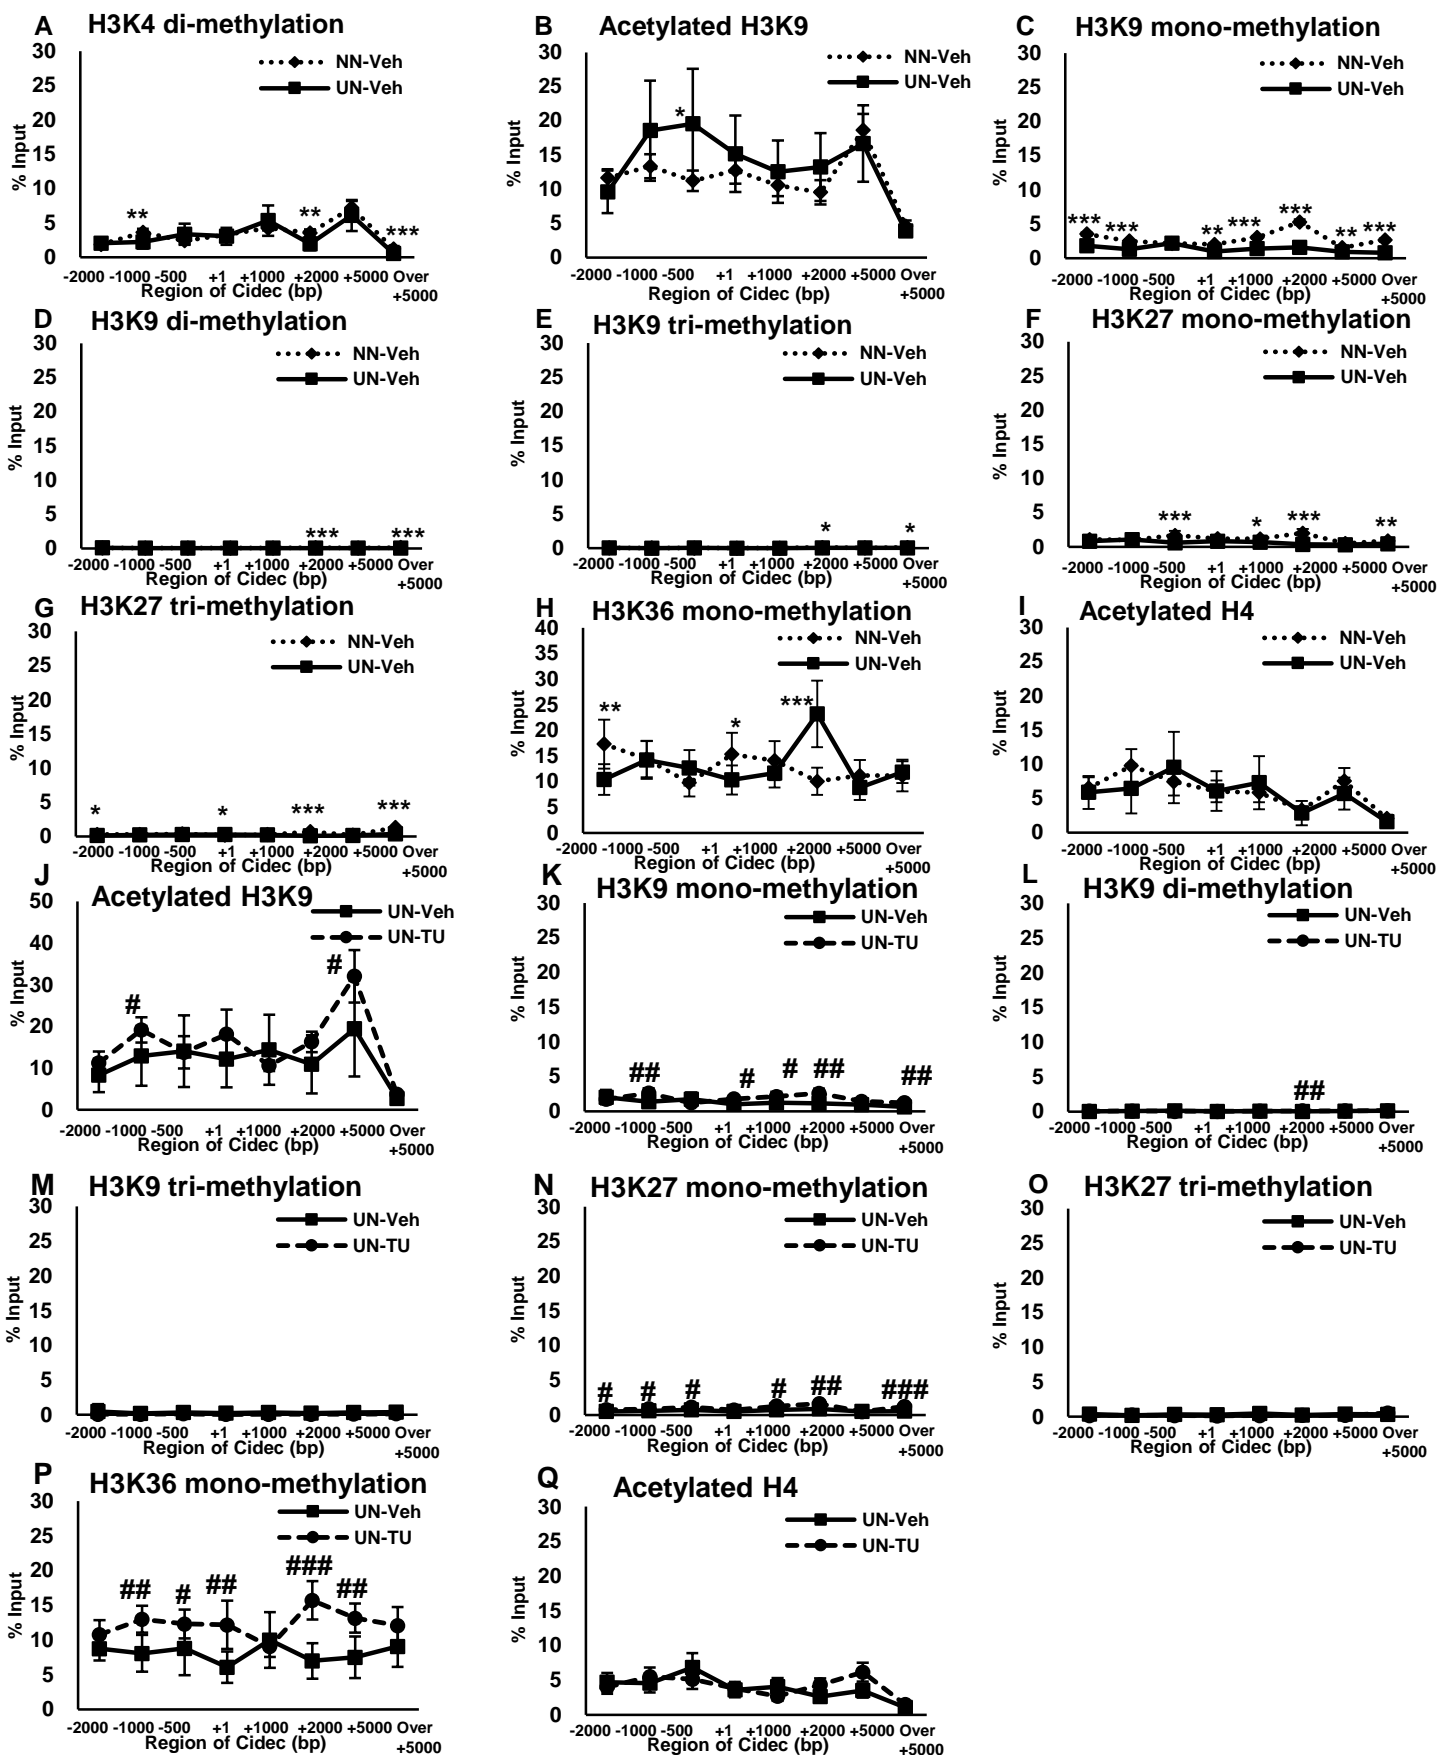

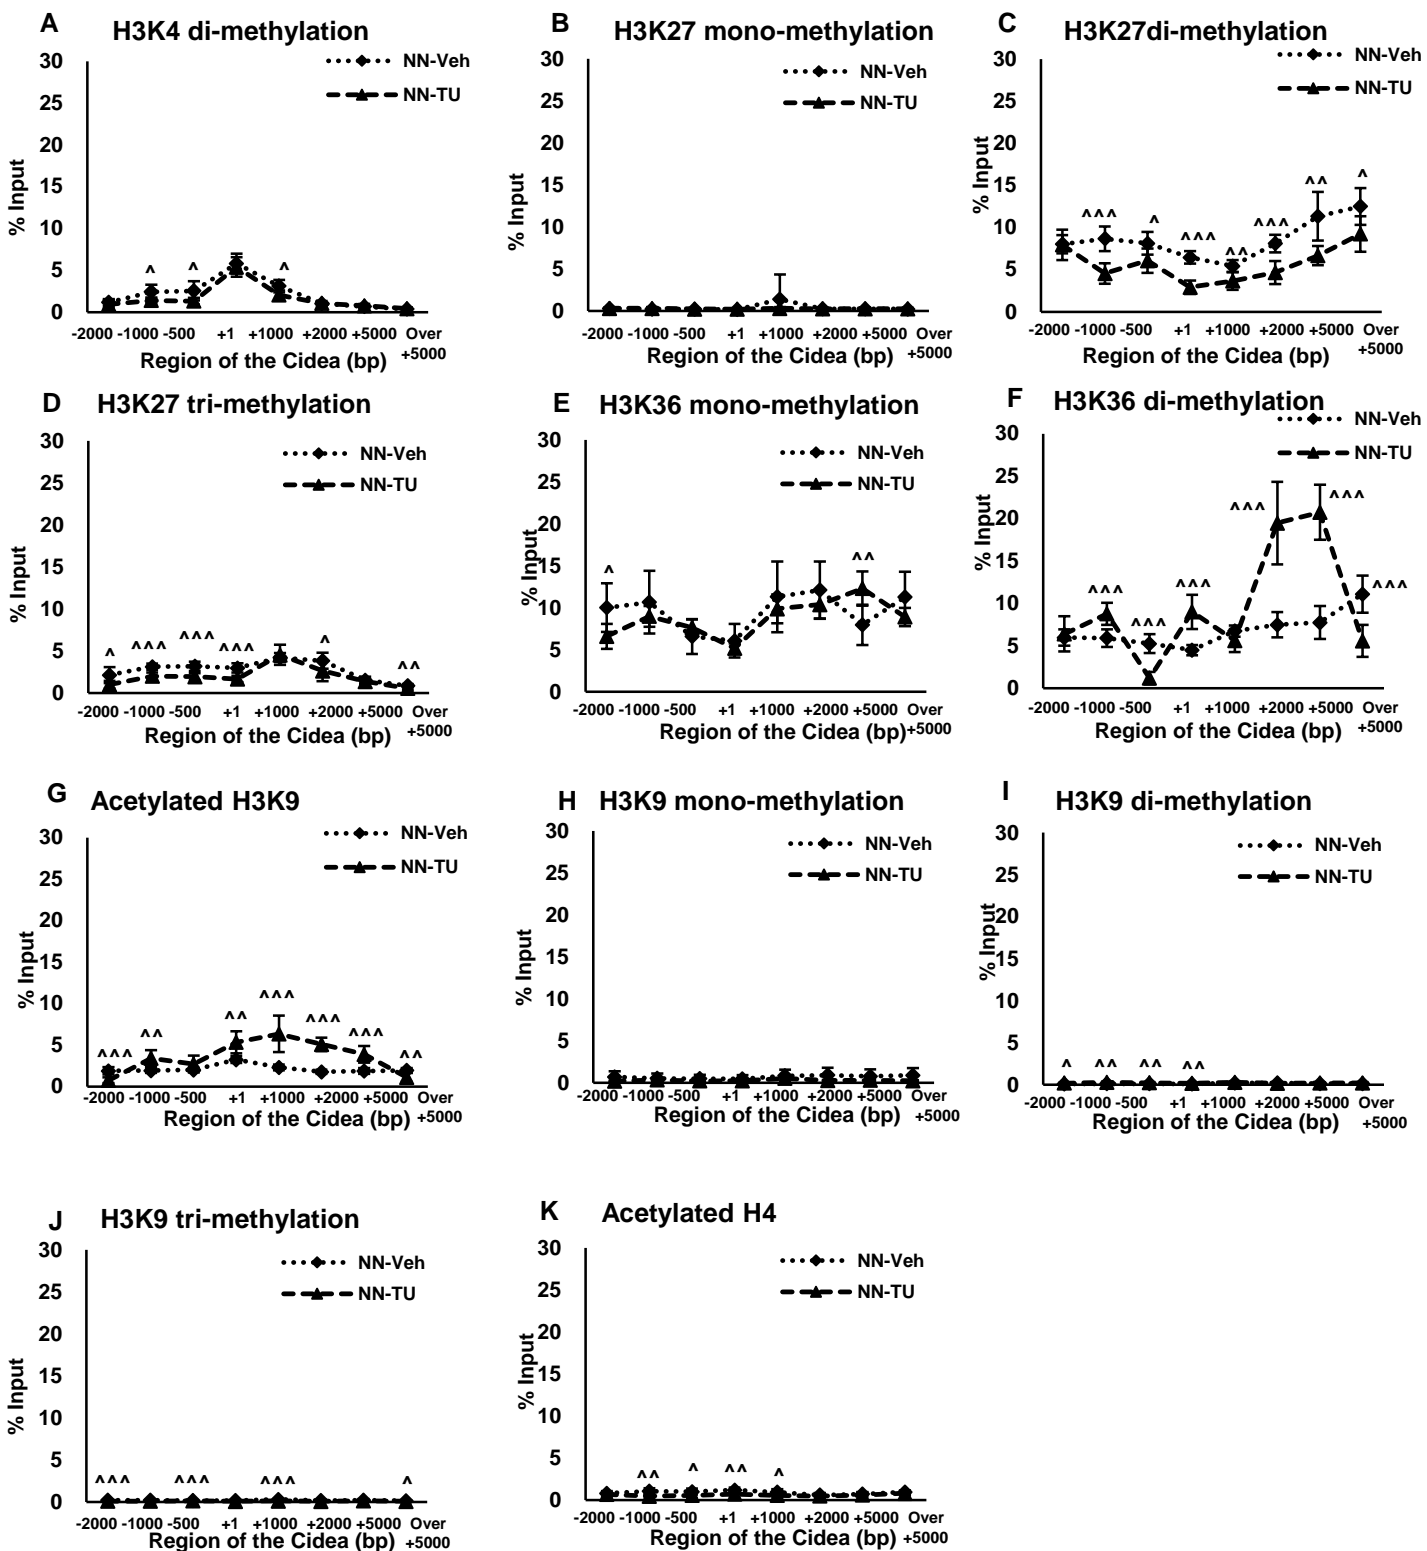

**Supplemental Figure S6. Histone modifications around Cidea by ChIP assays in NN *in utero* after the TUDCA treatment.** Mean values are expressed with SD with error bars ( $p^{\wedge} < 0.05$ ,  $p^{\wedge\wedge} < 0.01$ ,  $p^{\wedge\wedge\wedge} < 0.001$ ), with the Student's t-test or Mann-Whitney U test as appropriate. The X-axis shows the region of gene length and the y-axis is % input.

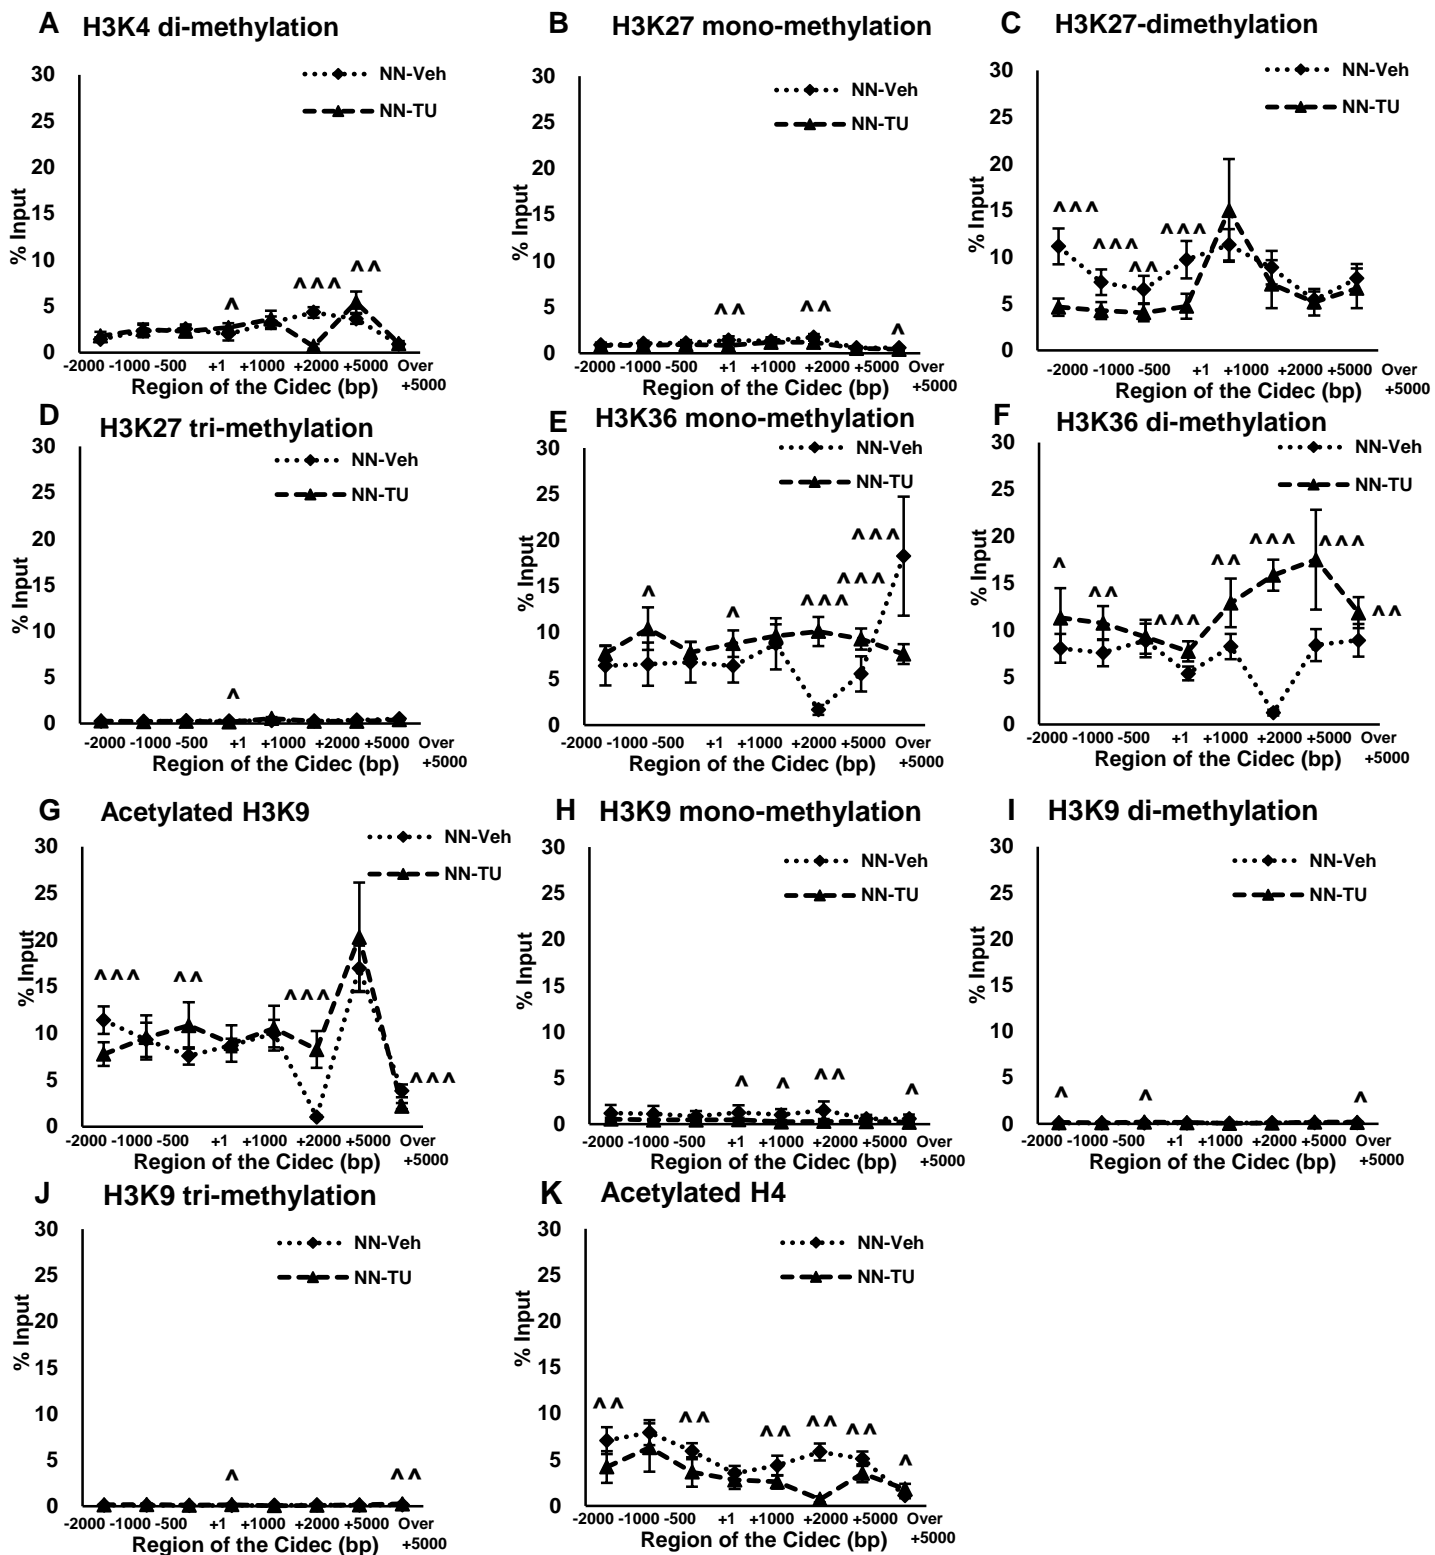

**Supplemental Figure S7. Histone modifications around Cidec by ChIP assays in NN *in utero* after the TUDCA treatment.** Mean values are expressed with SD with error bars ( $p^ < 0.05$ ,  $p^^ < 0.01$ ,  $p^^^ < 0.001$ ), with the Student's t-test or Mann-Whitney U test as appropriate. The X-axis shows the region of gene length and the y-axis is % input.



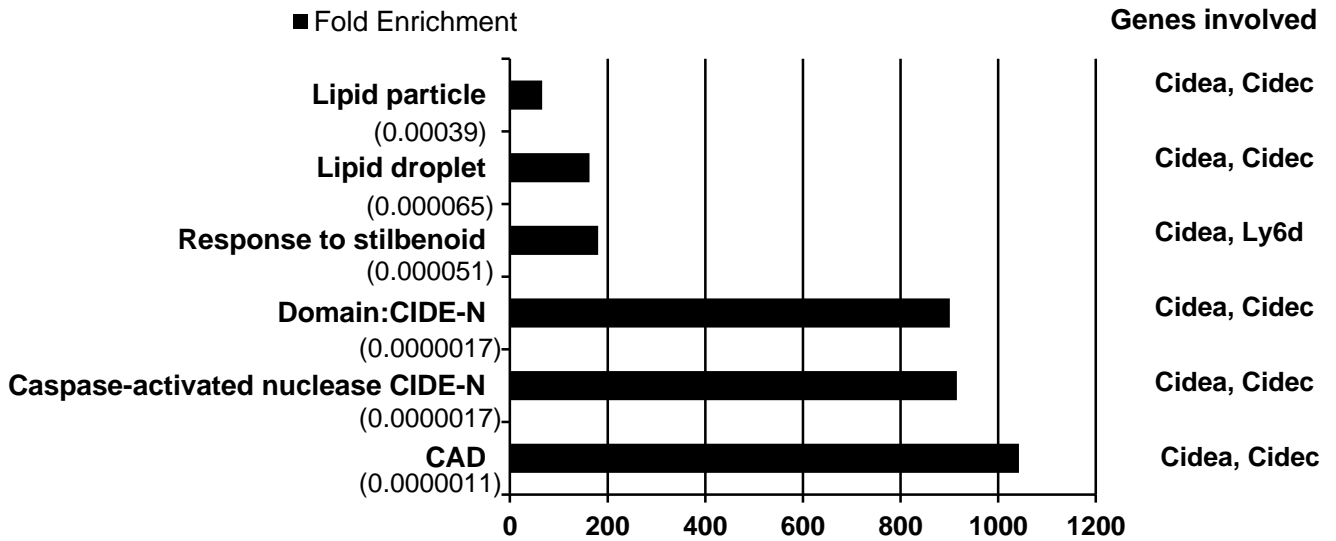

**Supplemental Figure S8. Functional Enrichment Analysis of 9 GOI.**

X axis showing fold enrichment and y axis showing function involved, along with the genes involved on the right side. We used DAVID Bioinformatics Resources 6.8 for gene enrichment analysis with functional annotation. Statistical significance was calculated by Fisher exact test and mentioned beside each pathway. CAD (Caspase-activated Dnase) or also called CIDE-N (Cell death inducing DNA fragmentation factor-N) is the N terminal part of domain where protein-protein interaction of CIDE proteins (Cidea, Cidec) occur in apoptotic pathway.

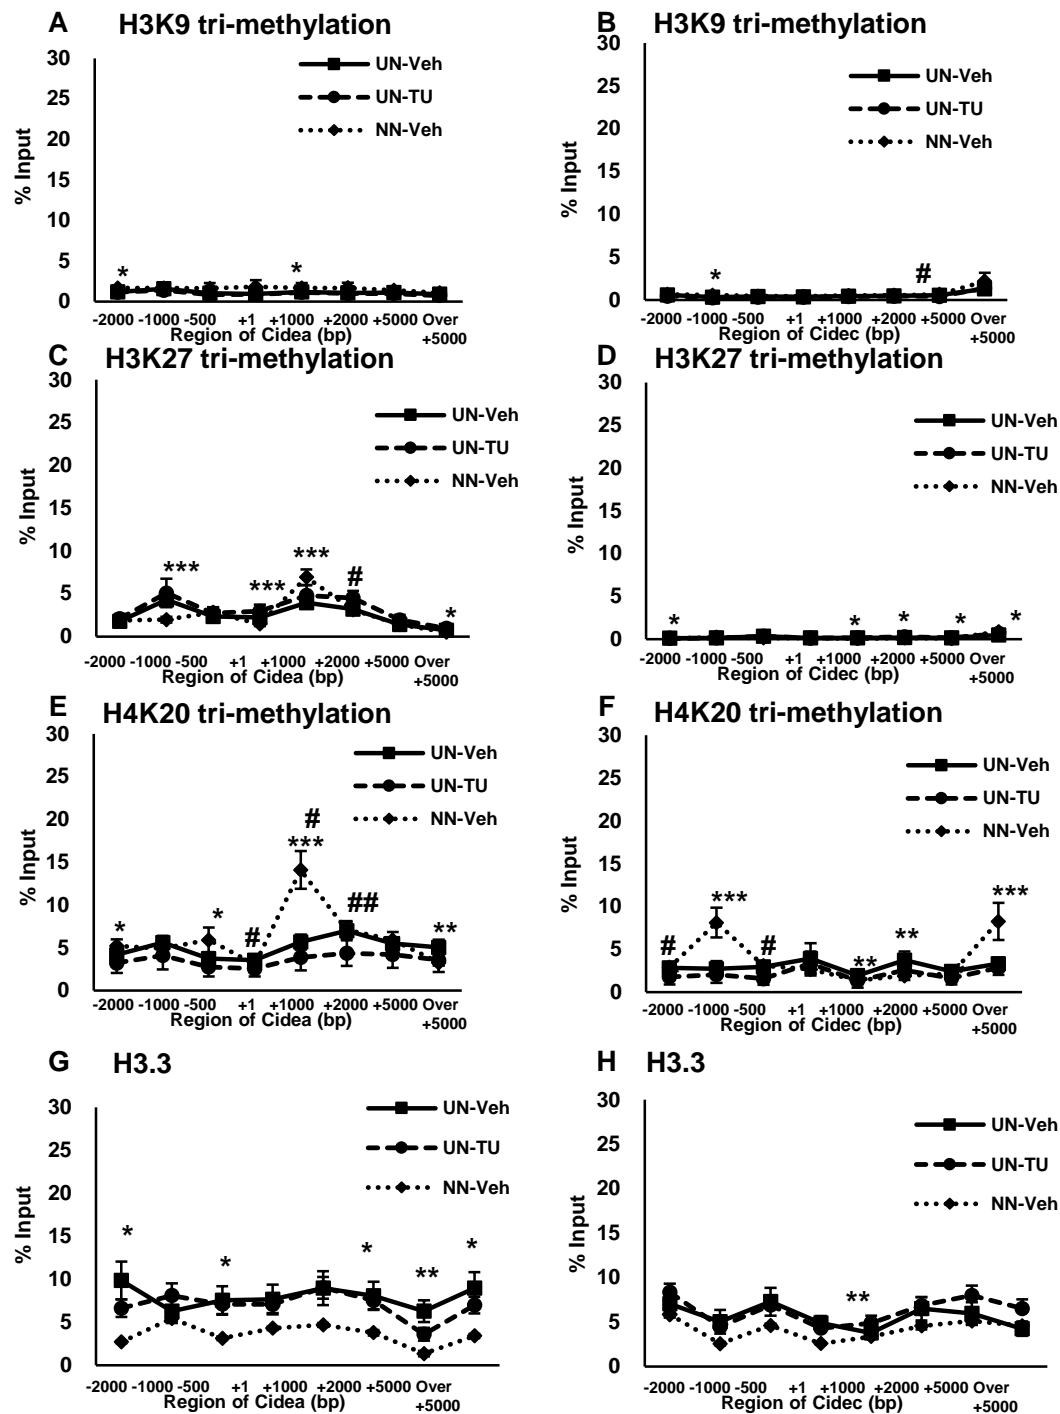

**Supplemental Figure S9. Histone modifications around Cidea by ChIP assays at 22 weeks in NN *in utero*, UN *in utero* with or without TUDCA.** Mean values are expressed with SD with error bars (\* or #  $p < 0.05$ , \*\* or ##  $p < 0.01$ , \*\*\* or ###  $p < 0.001$ ), with the Student's t-test or Mann-Whitney U test as appropriate. The X-axis shows the region of gene length and the y-axis is % input. Two different antibodies showed similar negative data in H3K9 (A,B) and H3K27 (C, D) tri-methylation.

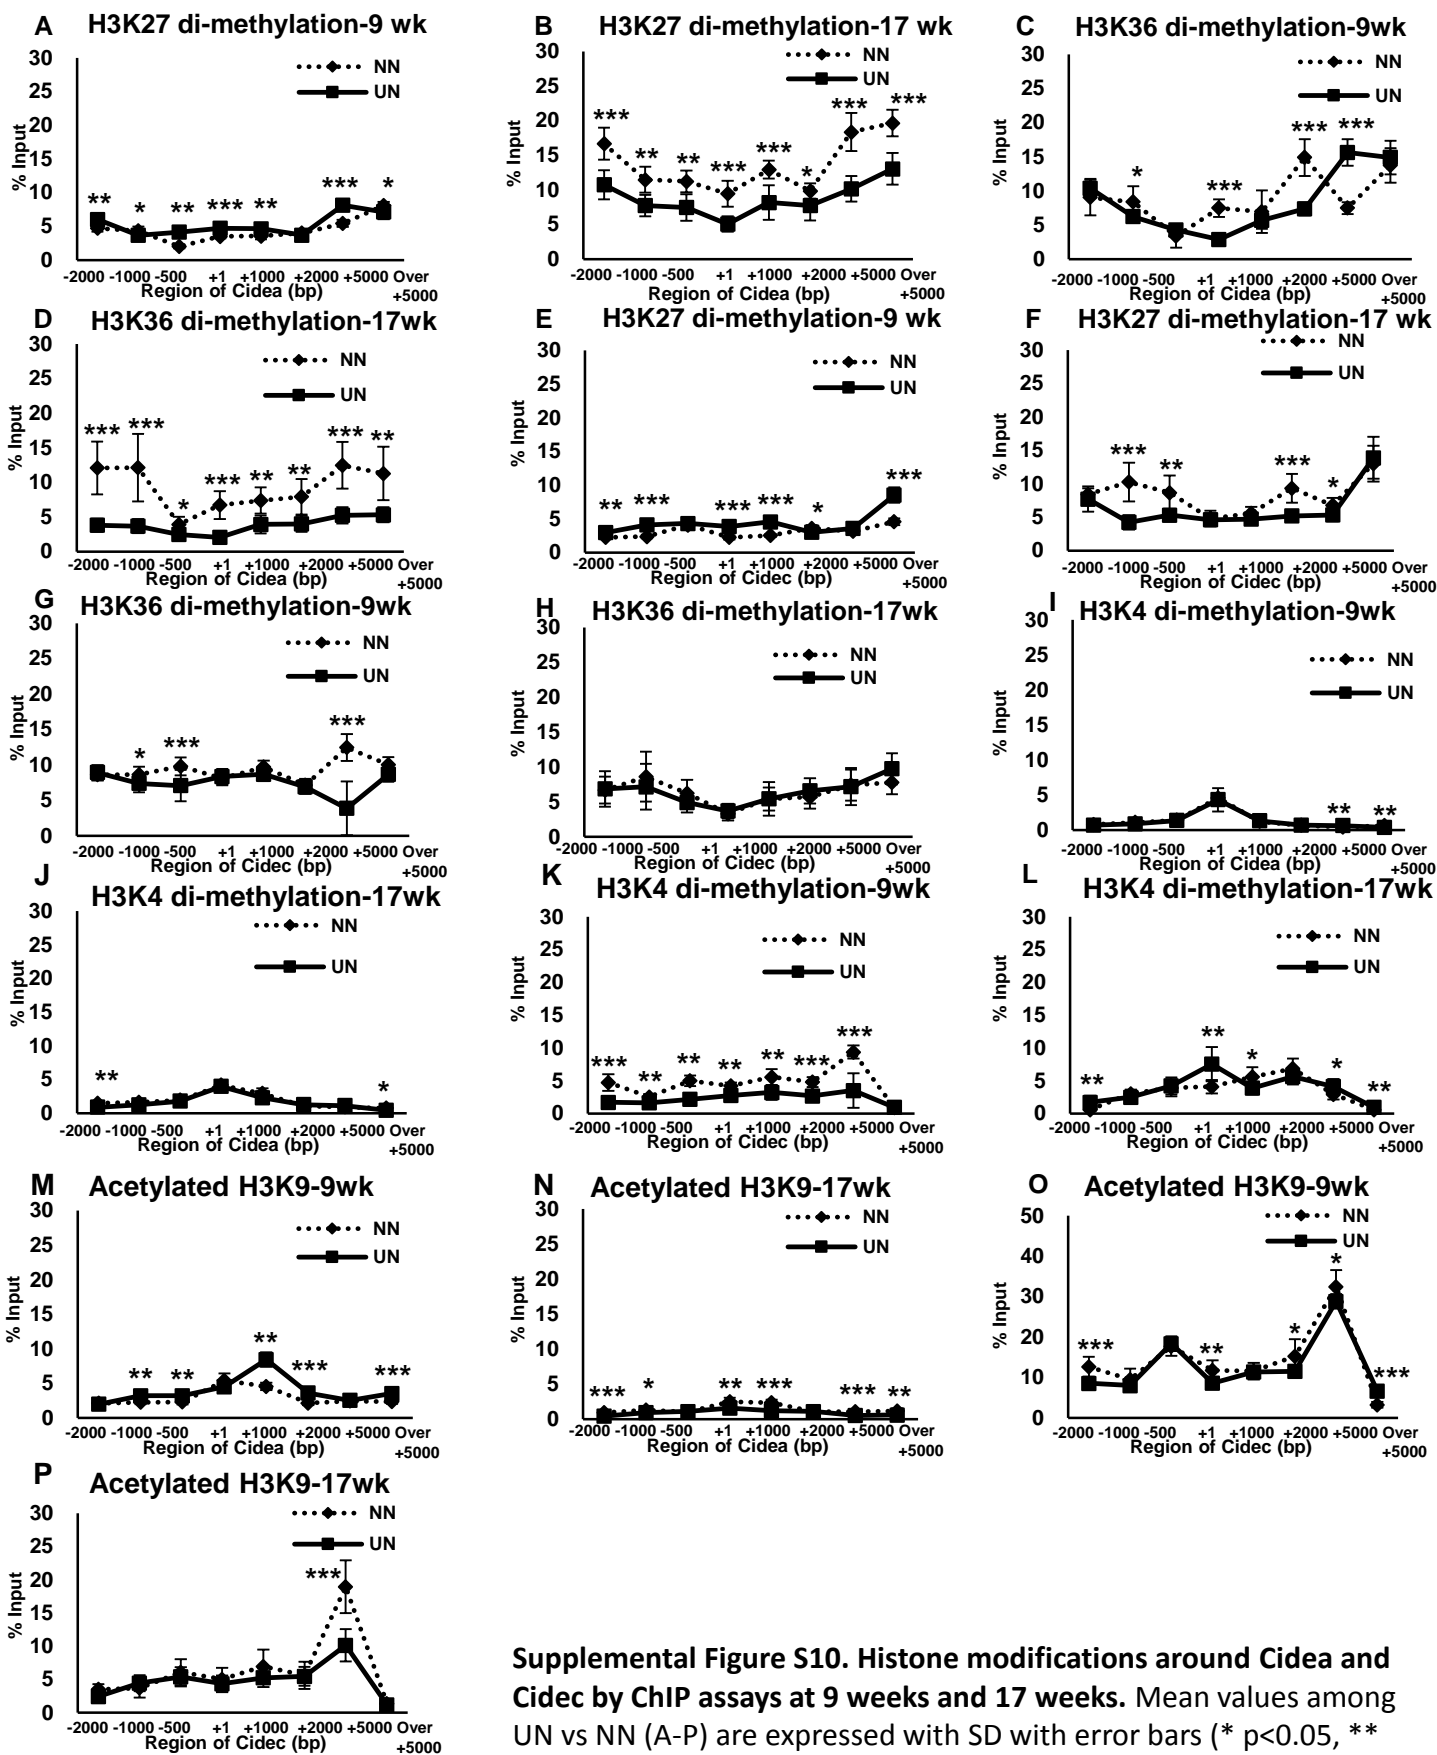

**Supplemental Figure S10. Histone modifications around Cidea and Cidec by ChIP assays at 9 weeks and 17 weeks.** Mean values among UN vs NN (A-P) are expressed with SD with error bars (\*  $p < 0.05$ , \*\*  $p < 0.01$ , \*\*\*  $p < 0.001$ ), with the Student's t-test or Mann-Whitney U test as appropriate. The X-axis shows the region of gene length and the y-axis is % input.

**Supplemental Table S1. Genes of interest expressed at 9, 17 and 22 weeks of age in a microarray analysis.**

A list of genes of interest (GOI) with linear fold changes in mRNA expression in a microarray analysis of cohorts 1, 2, and 3. Comparisons between two groups were performed by a one-way ANOVA between the subjects analyzed (unpaired). The significance of differences is stated as ANOVA P values. In cohorts 1 and 2, genes were selected by filtering genes that were differentially and significantly expressed between UN and NN (cut-off point:  $\leq -2$  or  $\geq 2$  linear fold change and ANOVA P value  $< 0.05$ ). In cohort 3, genes that were differentially expressed and then altered by the TUDCA treatment in UN-Veh were selected (cut-off point:  $\leq -2$  or  $\geq 2$  linear fold change and ANOVA P value  $< 0.05$ ).

| Gene symbol     | Linear fold change (UN vs. NN) | ANOVA P value | Bi-weight average signal (NN, log <sub>2</sub> ±SD) | Bi-weight average signal (UN, log <sub>2</sub> ±SD) |
|-----------------|--------------------------------|---------------|-----------------------------------------------------|-----------------------------------------------------|
| <b>9 weeks</b>  |                                |               |                                                     |                                                     |
| Gm24869         | 2.11                           | 0.02          | 3.61±0.37                                           | 4.69±0.05                                           |
| Gm17349         | 2.00                           | 0.02          | 4.45±0.29                                           | 5.45±0.25                                           |
| Rpl7a-ps8       | -2.00                          | 0.01          | 4.16±0.26                                           | 3.16±0.18                                           |
| Abcd2           | -2.05                          | 0.01          | 8.09±0.20                                           | 7.05±0.26                                           |
| Gm25568         | -2.06                          | 0.05          | 3.46±0.59                                           | 2.42±0.09                                           |
| Gm22935         | -2.06                          | 0.02          | 7.54±0.35                                           | 6.50±0.40                                           |
| Foxq1           | -2.21                          | 0.03          | 7.83±0.57                                           | 6.69±0.31                                           |
| Cish            | -3.59                          | 0.03          | 5.68±0.51                                           | 3.84±0.56                                           |
| <b>17 weeks</b> |                                |               |                                                     |                                                     |
| Cidea           | 4.32                           | 0.01          | 4.28±0.45                                           | 6.39±0.86                                           |
| Acmsd           | -3.40                          | 0.03          | 7.80±0.79                                           | 6.03±1.11                                           |
| Cyp2b13         | 3.38                           | 0.04          | 4.56±0.64                                           | 6.32±0.89                                           |
| Orm3            | 2.91                           | 0.00          | 3.90±0.45                                           | 5.45±0.11                                           |
| Tcf24           | -2.15                          | 0.02          | 5.15±0.50                                           | 4.05±0.46                                           |
| Gm4956          | -2.07                          | 0.00          | 7.00±0.27                                           | 5.95±0.24                                           |
| Themis          | 2.70                           | 0.02          | 4.70±0.31                                           | 6.13±0.71                                           |
| Gm25664         | 2.34                           | 0.04          | 2.89±0.11                                           | 4.12±0.85                                           |
| Gm24143         | 2.30                           | 0.02          | 5.95±0.45                                           | 7.16±0.39                                           |
| Ifi2712b        | 2.29                           | 0.00          | 4.61±0.45                                           | 5.80±0.12                                           |
| Gm25545         | -2.40                          | 0.01          | 6.10±0.27                                           | 4.84±0.66                                           |

| Gene symbol                                                         | Linear fold change<br>(UN vs. NN) | ANOVA<br>P value | Bi-weight<br>average signal<br>(NN, log2±SD) | Bi-weight<br>average signal<br>(UN, log2±SD) |
|---------------------------------------------------------------------|-----------------------------------|------------------|----------------------------------------------|----------------------------------------------|
| Olf766                                                              | 2.28                              | 0.01             | 2.15±0.07                                    | 3.35±0.57                                    |
| Gm25206                                                             | -2.84                             | 0.03             | 4.92±0.29                                    | 3.41±0.96                                    |
| Klk1b16                                                             | 2.25                              | 0.03             | 3.93±0.17                                    | 5.11±0.81                                    |
| Ly6d                                                                | 2.17                              | 0.00             | 6.33±0.40                                    | 7.45±0.31                                    |
| Olf1285                                                             | 2.14                              | 0.04             | 2.05±0.07                                    | 3.14±0.73                                    |
| Kifc1                                                               | 2.13                              | 0.04             | 2.88±0.35                                    | 3.97±0.72                                    |
| A4gnt                                                               | 2.13                              | 0.01             | 2.86±0.04                                    | 3.95±0.47                                    |
| 9230110F15Rik                                                       | 2.12                              | 0.02             | 2.63±0.34                                    | 3.71±0.44                                    |
| Gm22127                                                             | -2.09                             | 0.01             | 3.63±0.47                                    | 2.56±0.43                                    |
| Vmn1r208;<br>Vmn1r-ps111                                            | 2.09                              | 0.01             | 2.43±0.10                                    | 3.49±0.60                                    |
| Olf145                                                              | 2.09                              | 0.04             | 4.00±0.11                                    | 5.06±0.69                                    |
| Gm25930                                                             | -3.30                             | 0.01             | 5.64±0.30                                    | 3.92±0.85                                    |
| Gm23538                                                             | 2.03                              | 0.02             | 2.97±0.29                                    | 3.99±0.61                                    |
| Trav15-1-dv6-1;<br>Trav14-1                                         | 2.01                              | 0.03             | 1.95±0.36                                    | 2.96±0.42                                    |
| Gm24783                                                             | 2.01                              | 0.05             | 3.08±0.32                                    | 4.08±0.44                                    |
| Gm24149                                                             | -2.98                             | 0.01             | 5.02±0.45                                    | 3.44±0.78                                    |
| Gm24938;<br>Gm23256;<br>Gm26140;<br>Gm22707;<br>Gm22908;<br>Gm25196 | -3.38                             | 0.01             | 4.75±0.63                                    | 2.99±0.75                                    |
| Gm25985                                                             | -2.31                             | 0.01             | 5.18±0.27                                    | 3.97±0.56                                    |
| Rpp40                                                               | -2.00                             | 0.03             | 5.83±0.39                                    | 4.83±0.52                                    |
| 1700054O19Rik                                                       | -2.15                             | 0.04             | 6.44±0.49                                    | 5.34±0.73                                    |
| Snx29                                                               | -2.08                             | 0.01             | 5.24±0.18                                    | 4.18±0.40                                    |
| Snora81; Eif4a2                                                     | -2.03                             | 0.05             | 6.36±0.27                                    | 5.34±0.80                                    |
| Gm25024                                                             | -2.16                             | 0.05             | 3.87±0.48                                    | 2.76±0.38                                    |
| Gm9703                                                              | -2.00                             | 0.05             | 8.63±0.19                                    | 7.63±0.84                                    |
| 4932415M13Rik                                                       | -2.13                             | 0.00             | 3.56±0.36                                    | 2.47±0.21                                    |
| Gm22645                                                             | -3.02                             | 0.02             | 4.59±0.58                                    | 3.00±0.55                                    |
| Zfp119a                                                             | -2.08                             | 0.02             | 5.22±0.35                                    | 4.16±0.55                                    |
| Gm24292                                                             | -2.03                             | 0.02             | 3.08±0.61                                    | 2.06±0.31                                    |
| Cyp17a1                                                             | -3.38                             | 0.02             | 9.93±0.50                                    | 8.18±0.92                                    |
| Gm23503                                                             | -3.32                             | 0.01             | 6.56±0.46                                    | 4.83±0.83                                    |
| Gm4450                                                              | -2.10                             | 0.04             | 4.90±0.29                                    | 3.83±0.57                                    |
|                                                                     |                                   |                  |                                              |                                              |

| Gene symbol                                             | Linear fold change<br>(UN vs. NN) | ANOVA<br>P value | Bi-weight<br>average signal<br>(NN, log <sub>2</sub> ±SD) | Bi-weight<br>average signal<br>(UN, log <sub>2</sub> ±SD) |
|---------------------------------------------------------|-----------------------------------|------------------|-----------------------------------------------------------|-----------------------------------------------------------|
| Hsd3b4;<br>Gm10681;<br>Gm4450                           | -2.79                             | 0.00             | 6.25±0.58                                                 | 4.77±0.14                                                 |
| Hsd3b4;<br>Gm10681;<br>Gm4450                           | -2.79                             | 0.00             | 6.25±0.58                                                 | 4.77±0.14                                                 |
| Hsd3b5                                                  | -17.71                            | 0.00             | 7.19±1.07                                                 | 3.04±0.73                                                 |
| Gm12508                                                 | -2.37                             | 0.04             | 6.37±0.09                                                 | 5.12±0.94                                                 |
| Gm25937                                                 | -3.19                             | 0.02             | 5.98±0.40                                                 | 4.30±0.95                                                 |
| Gm4963                                                  | -3.19                             | 0.04             | 5.86±0.29                                                 | 4.19±1.23                                                 |
| Spr-ps1                                                 | -2.11                             | 0.00             | 4.95±0.07                                                 | 3.88±0.38                                                 |
| Clec2h                                                  | -2.59                             | 0.01             | 6.07±0.66                                                 | 4.70±0.29                                                 |
| Gm22155                                                 | -3.15                             | 0.03             | 6.71±0.79                                                 | 5.06±0.99                                                 |
| Slc1a1                                                  | -2.91                             | 0.01             | 9.62±0.51                                                 | 8.08±1.07                                                 |
| Gm24701                                                 | -5.47                             | 0.03             | 5.91±0.82                                                 | 3.46±1.10                                                 |
| Gm24938;<br>Gm23256;<br>Gm26140;<br>Gm22707;<br>Gm22908 | -3.38                             | 0.01             | 4.75±0.63                                                 | 2.99±0.75                                                 |
| Hamp2                                                   | -2.39                             | 0.03             | 9.80±0.21                                                 | 8.54±1.18                                                 |
| Cdh1                                                    | -2.01                             | 0.00             | 6.47±0.32                                                 | 5.46±0.16                                                 |
| Slc10a2                                                 | -2.22                             | 0.03             | 7.21±0.30                                                 | 6.06±0.82                                                 |
| Snord13                                                 | -2.70                             | 0.05             | 7.26±0.28                                                 | 5.83±1.07                                                 |
| Gm23128                                                 | -2.13                             | 0.01             | 4.37±0.20                                                 | 3.28±0.44                                                 |
| Gm10717                                                 | -2.27                             | 0.05             | 8.22±0.22                                                 | 7.04±1.38                                                 |
| Gm22717                                                 | -2.16                             | 0.01             | 4.67±0.16                                                 | 3.56±0.63                                                 |
| Gm22866                                                 | -5.12                             | 0.04             | 9.10±0.53                                                 | 6.74±1.81                                                 |
| mt-Tt                                                   | -3.51                             | 0.01             | 5.66±0.24                                                 | 3.85±0.97                                                 |
| mt-Ta                                                   | -3.59                             | 0.00             | 8.33±0.37                                                 | 6.49±0.82                                                 |
| mt-Tc                                                   | -3.93                             | 0.00             | 6.27±0.70                                                 | 4.29±0.46                                                 |
| mt-Ty                                                   | -5.07                             | 0.01             | 6.53±0.79                                                 | 4.19±0.98                                                 |
| mt-Ts1                                                  | -4.37                             | 0.03             | 7.00±0.55                                                 | 4.87±1.34                                                 |
| mt-Tc                                                   | -3.93                             | 0.00             | 6.27±0.70                                                 | 4.29±0.46                                                 |
| mt-Ty                                                   | -5.04                             | 0.01             | 6.55±0.74                                                 | 4.22±0.94                                                 |
| mt-Ts1                                                  | -5.53                             | 0.01             | 6.43±0.62                                                 | 3.96±1.21                                                 |
| mt-Tl2                                                  | -2.79                             | 0.01             | 5.71±0.26                                                 | 4.23±1.03                                                 |
| mt-Tt                                                   | -2.78                             | 0.00             | 4.78±0.23                                                 | 3.30±0.38                                                 |
| mt-Ta                                                   | -3.08                             | 0.01             | 8.32±0.36                                                 | 6.69±0.92                                                 |

| Gene symbol     | Linear fold change<br>(UN vs. NN) | ANOVA P<br>value | Bi-weight<br>average signal<br>(NN, log <sub>2</sub> ±SD) | Bi-weight<br>average signal<br>(UN, log <sub>2</sub> ±SD) |
|-----------------|-----------------------------------|------------------|-----------------------------------------------------------|-----------------------------------------------------------|
| <b>22 weeks</b> |                                   |                  |                                                           |                                                           |
| Cidea           | 4.47±0.38                         | 4.77±0.77        | 7.99±0.41                                                 | 5.45±1.25                                                 |
| Cidec           | 6.47±0.62                         | 6.40±0.78        | 8.96±0.17                                                 | 6.96±1.36                                                 |
| Rgs16           | 7.14±0.72                         | 7.91±1.14        | 9.31±0.82                                                 | 7.23±1.84                                                 |
| Orm3            | 4.23±0.54                         | 3.89±0.17        | 5.97±0.41                                                 | 3.83±0.12                                                 |
| Igfbp1          | 7.38±0.17                         | 7.45±0.54        | 6.34±0.12                                                 | 7.55±0.52                                                 |
| Rarres1         | 5.59±0.14                         | 6.47±1.11        | 7.22±0.19                                                 | 5.98±0.89                                                 |
| Ly6d            | 6.04±0.61                         | 5.96±0.35        | 7.62±0.56                                                 | 6.34±0.34                                                 |
| Sprr1a          | 3.78±0.25                         | 3.43±0.30        | 5.04±0.40                                                 | 3.79±0.58                                                 |
| Acot2           | 7.69±0.24                         | 7.75±0.25        | 8.91±0.24                                                 | 7.81±0.89                                                 |
| Slc3a1          | 9.84±0.20                         | 9.05±0.56        | 8.43±0.02                                                 | 9.44±0.73                                                 |
| Themis          | 4.61±0.36                         | 3.50±0.26        | 5.82±0.25                                                 | 3.95±0.38                                                 |
| Cyp17a1         | 10.2±0.15                         | 8.46±1.06        | 8.83±0.47                                                 | 10.36±0.52                                                |
| Gstm3           | 7.98±0.56                         | 7.05±0.39        | 9.13±0.16                                                 | 7.78±0.28                                                 |
| Weel            | 5.44±0.11                         | 5.04±0.57        | 6.53±0.52                                                 | 5.11±0.49                                                 |
| Ifi2712b        | 4.74±0.57                         | 4.48±0.22        | 5.81±0.40                                                 | 4.52±0.38                                                 |

**Supplementary Table S2. Candidate gene from expression analysis in cohort 3**

NN-Veh, NN-TU, UN-Veh, and UN-TU. Genes in UN-Veh were differentially expressed from those in NN-Veh, and restored by the TUDCA treatment in UN-TU from those in NN-TU (cut-off point:  $\leq -2$  or  $\geq 2$  linear fold change and ANOVA P-value  $< 0.05$ ).

| Gene Symbol | Effects of UN <i>in utero</i> (UN-Veh vs. NN-Veh) | ANOVA P value (UN-Veh vs. NN-Veh) | TUDCA response in NN (NN-TU vs. NN-Veh) | ANOVA P value (NN-TU vs. NN-Veh) | TUDCA response in UN (UN-TU vs. UN-Veh) | ANOVA P value (UN-TU vs. UN-Veh) |
|-------------|---------------------------------------------------|-----------------------------------|-----------------------------------------|----------------------------------|-----------------------------------------|----------------------------------|
| Cidea       | 11.49                                             | 0.000                             | 1.23                                    | 0.54                             | -5.82                                   | 0.01                             |
| Cidec       | 5.60                                              | 0.000                             | -1.05                                   | 0.70                             | -3.99                                   | 0.02                             |
| Rgs16       | 4.51                                              | 0.00                              | 1.71                                    | 0.11                             | -4.24                                   | 0.10                             |
| Orm3        | 3.35                                              | 0.00                              | -1.26                                   | 0.33                             | -4.39                                   | 0.000                            |
| Rarres1     | 3.11                                              | 0.000                             | 1.85                                    | 0.53                             | -2.36                                   | 0.01                             |
| Ly6d        | 2.98                                              | 0.000                             | -1.06                                   | 0.47                             | -2.42                                   | 0.03                             |
| Sprr1a      | 2.40                                              | 0.02                              | -1.27                                   | 0.38                             | -2.38                                   | 0.01                             |
| Acot2       | 2.33                                              | 0.00                              | 1.05                                    | 0.18                             | -2.13                                   | 0.02                             |
| Themis      | 2.31                                              | 0.000                             | -2.17                                   | 0.71                             | -3.66                                   | 0.05                             |
| Gstm3       | 2.22                                              | 0.000                             | -1.90                                   | 0.08                             | -2.56                                   | 0.02                             |
| Wee1        | 2.11                                              | 0.00                              | -1.33                                   | 0.00                             | -2.67                                   | 0.000                            |
| Ifi2712b    | 2.09                                              | 0.00                              | -1.20                                   | 0.07                             | -2.44                                   | 0.01                             |
| Igfbp1      | -2.06                                             | 0.01                              | 1.05                                    | 0.06                             | 2.31                                    | 0.000                            |
| Cyp17a1     | -2.58                                             | 0.01                              | -3.34                                   | 0.19                             | 2.89                                    | 0.00                             |
| Slc3a1      | -2.67                                             | 0.04                              | -1.73                                   | 0.21                             | 2.02                                    | 0.01                             |



**Supplemental Table S3. Longitudinal gene expression analysis (comparison between cohorts) to investigate candidate genes of interest over 9, 17, and 22 weeks**

Linear fold changes in different genes shown with the longitudinal time periods of cohorts 1, 2, and 3 with their ANOVA P values. Here we observed 133 genes altered in their expression in cohort 2 vs cohort 1 (cut-off point:  $\leq -2$  or  $\geq 2$  linear fold change, ANOVA P value  $< 0.05$ ) among UN *in utero* and contrast them against genes among NN (cohort 2 vs cohort 1).

| Gene Symbol                  | Linear Fold Change<br>(UN in cohort 2 vs cohort 1) | ANOVA P value<br>(UN in cohort 2 vs cohort 1) | Linear Fold Change<br>(NN in cohort 2 vs cohort 1) | ANOVA P value<br>(NN in cohort 2 vs cohort 1) | Linear Fold Change<br>(UN in cohort 3 vs cohort 2) | ANOVA P value<br>(UN in cohort 3 vs cohort 2) | Linear Fold Change<br>(In cohort 3; UN-Veh vs. NN-Veh) | ANOVA P value<br>(In cohort 3; UN-Veh vs. NN-Veh) | Linear Fold Change<br>(In cohort 3; UN-TU vs. UN-Veh) | ANOVA P value<br>(In cohort 3; UN-TU vs. UN-Veh) |
|------------------------------|----------------------------------------------------|-----------------------------------------------|----------------------------------------------------|-----------------------------------------------|----------------------------------------------------|-----------------------------------------------|--------------------------------------------------------|---------------------------------------------------|-------------------------------------------------------|--------------------------------------------------|
| Cyp2b9                       | 40.81                                              | 0.003                                         | 7.88                                               | 0.037                                         | 1.22                                               | 0.281                                         | 1.67                                                   | 0.001                                             | 1.10                                                  | 0.688                                            |
| Rgs16                        | 9.67                                               | 0.000                                         | 5.71                                               | 0.439                                         | 1.55                                               | 0.218                                         | 4.51                                                   | 0.004                                             | -4.24                                                 | 0.097                                            |
| Saa2                         | 9.41                                               | 0.036                                         | 4.31                                               | 0.009                                         | -1.23                                              | 0.594                                         | 1.47                                                   | 0.109                                             | -1.46                                                 | 0.095                                            |
| Cidec                        | 8.77                                               | 0.001                                         | 2.87                                               | 0.071                                         | 1.64                                               | 0.162                                         | 5.60                                                   | 0.000                                             | -3.99                                                 | 0.017                                            |
| Apoa4                        | 6.39                                               | 0.015                                         | 3.33                                               | 0.004                                         | 1.26                                               | 0.160                                         | 2.65                                                   | 0.000                                             | -1.70                                                 | 0.029                                            |
| Cidea                        | 5.68                                               | 0.010                                         | 1.62                                               | 0.260                                         | 3.04                                               | 0.009                                         | 11.49                                                  | 0.000                                             | -5.82                                                 | 0.011                                            |
| Slc22a27                     | 5.37                                               | 0.032                                         | 6.28                                               | 0.007                                         | 1.73                                               | 0.249                                         | 2.28                                                   | 0.006                                             | -1.66                                                 | 0.054                                            |
| Lcn2                         | 5.29                                               | 0.012                                         | 1.97                                               | 0.001                                         | 1.20                                               | 0.809                                         | 1.77                                                   | 0.052                                             | -1.44                                                 | 0.358                                            |
| Themis                       | 5.09                                               | 0.003                                         | 2.41                                               | 0.001                                         | -1.24                                              | 0.453                                         | 2.31                                                   | 0.003                                             | -3.66                                                 | 0.000                                            |
| Lgals1                       | 4.89                                               | 0.016                                         | 3.69                                               | 0.001                                         | -1.24                                              | 0.777                                         | 1.61                                                   | 0.018                                             | -1.73                                                 | 0.016                                            |
| Ifi2712b                     | 4.06                                               | 0.000                                         | 2.49                                               | 0.005                                         | 1.01                                               | 0.885                                         | 2.09                                                   | 0.037                                             | -2.44                                                 | 0.006                                            |
| Cyp17a1                      | 4.04                                               | 0.018                                         | 7.63                                               | 0.004                                         | 1.57                                               | 0.207                                         | -2.58                                                  | 0.002                                             | 2.89                                                  | 0.009                                            |
| Cyp2b13                      | 3.64                                               | 0.019                                         | 1.38                                               | 0.100                                         | 1.39                                               | 0.331                                         | 2.05                                                   | 0.023                                             | 1.14                                                  | 0.486                                            |
| 9030619<br>P08Rik            | 3.43                                               | 0.004                                         | 1.45                                               | 0.099                                         | 1.29                                               | 0.183                                         | 3.26                                                   | 0.000                                             | -1.16                                                 | 0.316                                            |
| Sprr1a                       | 3.09                                               | 0.022                                         | 1.73                                               | 0.169                                         | 1.04                                               | 0.806                                         | 2.40                                                   | 0.002                                             | -2.38                                                 | 0.020                                            |
| LOC1026<br>34708;<br>Gm11695 | 3.09                                               | 0.005                                         | 2.71                                               | 0.074                                         | -1.16                                              | 0.908                                         | -1.12                                                  | 0.931                                             | -1.66                                                 | 0.027                                            |

| Gene Symbol                  | Linear Fold Change<br>(UN in cohort 2 vs cohort 1) | ANOVA P value<br>(UN in cohort 2 vs cohort 1) | Linear Fold Change<br>(NN in cohort 2 vs cohort 1) | ANOVA P value<br>(NN in cohort 2 vs cohort 1) | Linear Fold Change<br>(UN in cohort 3 vs cohort 2) | ANOVA P value<br>(UN in cohort 3 vs cohort 2) | Linear Fold Change<br>(In cohort 3; UN-Veh vs. NN-Veh) | ANOVA P value<br>(In cohort 3; UN-Veh vs. NN-Veh) | Linear Fold Change<br>(In cohort 3; UN-TU vs. UN-Veh) | ANOVA P value<br>(In cohort 3; UN-TU vs. UN-Veh) |
|------------------------------|----------------------------------------------------|-----------------------------------------------|----------------------------------------------------|-----------------------------------------------|----------------------------------------------------|-----------------------------------------------|--------------------------------------------------------|---------------------------------------------------|-------------------------------------------------------|--------------------------------------------------|
| LOC102635290;<br>Gm12750     | 3.05                                               | 0.000                                         | 1.25                                               | 0.027                                         | -1.15                                              | 0.346                                         | 2.02                                                   | 0.001                                             | -1.87                                                 | 0.001                                            |
| Anxa2                        | 2.69                                               | 0.005                                         | 1.79                                               | 0.011                                         | 1.15                                               | 0.388                                         | 1.44                                                   | 0.087                                             | -1.56                                                 | 0.023                                            |
| Ly6d                         | 2.64                                               | 0.001                                         | 1.30                                               | 0.116                                         | 1.12                                               | 0.817                                         | 2.98                                                   | 0.021                                             | -2.42                                                 | 0.008                                            |
| Mogat1                       | 2.63                                               | 0.042                                         | 1.77                                               | 0.006                                         | 1.29                                               | 0.433                                         | 1.97                                                   | 0.003                                             | -1.46                                                 | 0.021                                            |
| Slc16a5                      | 2.59                                               | 0.016                                         | 2.40                                               | 0.002                                         | 1.32                                               | 0.168                                         | 1.26                                                   | 0.037                                             | -1.97                                                 | 0.004                                            |
| Orm3                         | 2.53                                               | 0.000                                         | 1.10                                               | 0.501                                         | 1.44                                               | 0.079                                         | 3.35                                                   | 0.002                                             | -4.39                                                 | 0.000                                            |
| Olfir373                     | 2.44                                               | 0.035                                         | -1.16                                              | 0.578                                         | -1.56                                              | 0.149                                         | 1.02                                                   | 0.960                                             | -1.33                                                 | 0.024                                            |
| 2010003<br>K11Rik            | 2.32                                               | 0.003                                         | 1.57                                               | 0.082                                         | 1.41                                               | 0.074                                         | 2.01                                                   | 0.005                                             | -1.75                                                 | 0.020                                            |
| Olfir766                     | 2.30                                               | 0.024                                         | -1.19                                              | 0.130                                         | -2.22                                              | 0.096                                         | -1.08                                                  | 0.643                                             | 1.03                                                  | 0.459                                            |
| Mmp12                        | 2.23                                               | 0.008                                         | 1.28                                               | 0.101                                         | -1.21                                              | 0.363                                         | 1.14                                                   | 0.083                                             | 1.02                                                  | 0.898                                            |
| Lamb3                        | 2.20                                               | 0.039                                         | 1.78                                               | 0.020                                         | 1.04                                               | 0.885                                         | 1.32                                                   | 0.034                                             | -1.48                                                 | 0.015                                            |
| Gprc5b                       | 2.15                                               | 0.023                                         | 1.20                                               | 0.212                                         | 1.27                                               | 0.456                                         | 1.23                                                   | 0.327                                             | 1.37                                                  | 0.693                                            |
| Cfd                          | 2.14                                               | 0.020                                         | 1.53                                               | 0.075                                         | -1.01                                              | 0.861                                         | 1.32                                                   | 0.034                                             | -1.59                                                 | 0.009                                            |
| Mtnr1a                       | 2.14                                               | 0.046                                         | 1.86                                               | 0.026                                         | 1.25                                               | 0.153                                         | 1.31                                                   | 0.013                                             | -1.01                                                 | 0.712                                            |
| Osbpl3                       | 2.14                                               | 0.011                                         | 1.86                                               | 0.031                                         | 1.44                                               | 0.093                                         | 1.85                                                   | 0.001                                             | -1.97                                                 | 0.013                                            |
| Gnpda1                       | 2.11                                               | 0.011                                         | 2.07                                               | 0.004                                         | 1.07                                               | 0.203                                         | 1.04                                                   | 0.279                                             | -1.15                                                 | 0.103                                            |
| Spc24                        | 2.07                                               | 0.005                                         | 1.43                                               | 0.008                                         | 1.00                                               | 0.880                                         | 1.38                                                   | 0.047                                             | -2.12                                                 | 0.005                                            |
| Enc1                         | 2.05                                               | 0.002                                         | 1.22                                               | 0.126                                         | 1.01                                               | 0.374                                         | 1.40                                                   | 0.013                                             | -1.28                                                 | 0.005                                            |
| Gm10680                      | 2.04                                               | 0.004                                         | 1.31                                               | 0.030                                         | 1.09                                               | 0.633                                         | 1.66                                                   | 0.016                                             | -1.70                                                 | 0.052                                            |
| Cenpn                        | 2.04                                               | 0.004                                         | 1.23                                               | 0.146                                         | -1.41                                              | 0.049                                         | -1.07                                                  | 0.137                                             | -1.04                                                 | 0.531                                            |
| Gm23538                      | 2.04                                               | 0.044                                         | -1.29                                              | 0.182                                         | -1.56                                              | 0.091                                         | 1.04                                                   | 0.730                                             | -1.22                                                 | 0.099                                            |
| Gm11788<br>;LOC102<br>640850 | 2.01                                               | 0.027                                         | 1.47                                               | 0.003                                         | 1.10                                               | 0.440                                         | 1.13                                                   | 0.145                                             | -1.31                                                 | 0.043                                            |
| Gm26159                      | -2.00                                              | 0.006                                         | -1.47                                              | 0.231                                         | 1.26                                               | 0.056                                         | -1.10                                                  | 0.854                                             | -1.05                                                 | 0.784                                            |
| Gm25107                      | -2.02                                              | 0.018                                         | -1.44                                              | 0.244                                         | -1.37                                              | 0.366                                         | -1.22                                                  | 0.329                                             | 1.75                                                  | 0.021                                            |
| Gm22785                      | -2.03                                              | 0.031                                         | -1.26                                              | 0.279                                         | 1.86                                               | 0.021                                         | 1.09                                                   | 0.402                                             | -1.20                                                 | 0.608                                            |
| Gm23422                      | -2.04                                              | 0.001                                         | -1.10                                              | 0.725                                         | 1.60                                               | 0.002                                         | 1.16                                                   | 0.451                                             | -1.06                                                 | 0.207                                            |

| Gene Symbol                   | Linear Fold Change<br>(UN in cohort 2 vs cohort 1) | ANOVA P value<br>(UN in cohort 2 vs cohort 1) | Linear Fold Change<br>(NN in cohort 2 vs cohort 1) | ANOVA P value<br>(NN in cohort 2 vs cohort 1) | Linear Fold Change<br>(UN in cohort 3 vs cohort 2) | ANOVA P value<br>(UN in cohort 3 vs cohort 2) | Linear Fold Change<br>(In cohort 3; UN-Veh vs. NN-Veh) | ANOVA P value<br>(In cohort 3; UN-Veh vs. NN-Veh) | Linear Fold Change<br>(In cohort 3; UN-TU vs. UN-Veh) | ANOVA P value<br>(In cohort 3; UN-TU vs. UN-Veh) |
|-------------------------------|----------------------------------------------------|-----------------------------------------------|----------------------------------------------------|-----------------------------------------------|----------------------------------------------------|-----------------------------------------------|--------------------------------------------------------|---------------------------------------------------|-------------------------------------------------------|--------------------------------------------------|
| Gm8430                        | -2.04                                              | 0.015                                         | 1.06                                               | 0.769                                         | 1.30                                               | 0.081                                         | -1.32                                                  | 0.200                                             | 1.01                                                  | 0.793                                            |
| Apom                          | -2.05                                              | 0.002                                         | -1.75                                              | 0.000                                         | -1.05                                              | 0.957                                         | -1.04                                                  | 0.218                                             | 1.28                                                  | 0.017                                            |
| Tcf24;<br>Gm10567             | -2.05                                              | 0.003                                         | -1.18                                              | 0.090                                         | 1.20                                               | 0.356                                         | -1.52                                                  | 0.004                                             | 1.27                                                  | 0.213                                            |
| Mir1970                       | -2.06                                              | 0.009                                         | -1.19                                              | 0.152                                         | 1.87                                               | 0.011                                         | -1.24                                                  | 0.223                                             | -1.07                                                 | 0.920                                            |
| Gm16551<br>;<br>Gm20649       | -2.07                                              | 0.004                                         | -1.42                                              | 0.034                                         | -1.05                                              | 0.982                                         | -1.01                                                  | 0.768                                             | 1.13                                                  | 0.129                                            |
| mt-Ta                         | -2.07                                              | 0.034                                         | -1.07                                              | 0.659                                         | 1.92                                               | 0.041                                         | -1.11                                                  | 0.454                                             | 1.38                                                  | 0.236                                            |
| Snord52;<br>1110038<br>B12Rik | -2.09                                              | 0.036                                         | -1.39                                              | 0.695                                         | 1.19                                               | 0.351                                         | 1.03                                                   | 0.767                                             | 1.02                                                  | 0.352                                            |
| Gm24202                       | -2.09                                              | 0.031                                         | 1.74                                               | 0.011                                         | 1.54                                               | 0.270                                         | 1.26                                                   | 0.692                                             | -1.63                                                 | 0.041                                            |
| Zbtb16                        | -2.12                                              | 0.042                                         | -1.33                                              | 0.561                                         | -1.11                                              | 0.535                                         | -3.42                                                  | 0.000                                             | -1.02                                                 | 0.471                                            |
| Gm2788                        | -2.12                                              | 0.028                                         | -2.71                                              | 0.079                                         | 1.58                                               | 0.117                                         | 2.13                                                   | 0.002                                             | -1.23                                                 | 0.699                                            |
| n-R5s127                      | -2.13                                              | 0.020                                         | -1.80                                              | 0.092                                         | -1.02                                              | 0.605                                         | -1.13                                                  | 0.823                                             | 1.31                                                  | 0.898                                            |
| Rpl36-<br>ps3                 | -2.14                                              | 0.020                                         | -1.26                                              | 0.243                                         | 1.42                                               | 0.174                                         | 1.06                                                   | 0.752                                             | -1.06                                                 | 0.987                                            |
| Gm22771                       | -2.14                                              | 0.045                                         | -1.35                                              | 0.190                                         | 1.60                                               | 0.171                                         | 1.28                                                   | 0.125                                             | -1.10                                                 | 0.584                                            |
| Gm26109                       | -2.15                                              | 0.006                                         | -1.87                                              | 0.107                                         | 1.36                                               | 0.097                                         | -1.10                                                  | 0.690                                             | 1.07                                                  | 0.588                                            |
| n-R5s64                       | -2.16                                              | 0.005                                         | -1.79                                              | 0.037                                         | 1.32                                               | 0.045                                         | -1.13                                                  | 0.491                                             | 1.06                                                  | 0.704                                            |
| Gm23247                       | -2.19                                              | 0.049                                         | -1.25                                              | 0.038                                         | 2.35                                               | 0.021                                         | -1.16                                                  | 0.181                                             | -1.07                                                 | 0.953                                            |
| Cyp26a1                       | -2.22                                              | 0.001                                         | -1.24                                              | 0.444                                         | 1.94                                               | 0.009                                         | 1.35                                                   | 0.269                                             | -1.28                                                 | 0.965                                            |
| Gm4956                        | -2.23                                              | 0.001                                         | -1.03                                              | 0.504                                         | 1.24                                               | 0.033                                         | -1.73                                                  | 0.001                                             | 1.41                                                  | 0.155                                            |
| Eif4ebp3                      | -2.24                                              | 0.003                                         | -1.23                                              | 0.161                                         | 1.05                                               | 0.400                                         | -1.08                                                  | 0.256                                             | -1.00                                                 | 0.958                                            |
| Npas2                         | -2.25                                              | 0.001                                         | -2.03                                              | 0.150                                         | 1.60                                               | 0.001                                         | -1.25                                                  | 0.171                                             | 2.36                                                  | 0.032                                            |
| Fgfr2                         | -2.25                                              | 0.029                                         | -1.03                                              | 0.692                                         | 1.74                                               | 0.052                                         | -1.29                                                  | 0.015                                             | 1.28                                                  | 0.044                                            |
| 4833411<br>C07Rik             | -2.28                                              | 0.005                                         | -1.51                                              | 0.019                                         | 1.31                                               | 0.069                                         | 1.20                                                   | 0.225                                             | 1.03                                                  | 0.764                                            |
| mt-Ta                         | -2.29                                              | 0.028                                         | -1.08                                              | 0.675                                         | 2.13                                               | 0.022                                         | -1.21                                                  | 0.396                                             | 1.47                                                  | 0.210                                            |
| Wrip1                         | -2.30                                              | 0.023                                         | -1.36                                              | 0.010                                         | 1.47                                               | 0.059                                         | -1.14                                                  | 0.066                                             | 1.23                                                  | 0.001                                            |
| Irf6                          | -2.31                                              | 0.008                                         | -2.17                                              | 0.000                                         | 1.07                                               | 0.318                                         | -1.18                                                  | 0.167                                             | 1.26                                                  | 0.016                                            |

| Gene Symbol                                               | Linear Fold Change<br>(UN in cohort 2 vs cohort 1) | ANOVA P value<br>(UN in cohort 2 vs cohort 1) | Linear Fold Change<br>(NN in cohort 2 vs cohort 1) | ANOVA P value<br>(NN in cohort 2 vs cohort 1) | Linear Fold Change<br>(UN in cohort 3 vs cohort 2) | ANOVA P value<br>(UN in cohort 3 vs cohort 2) | Linear Fold Change<br>(In cohort 3; UN-Veh vs. NN-Veh) | ANOVA P value<br>(In cohort 3; UN-Veh vs. NN-Veh) | Linear Fold Change<br>(In cohort 3; UN-TU vs. UN-Veh) | ANOVA P value<br>(In cohort 3; UN-TU vs. UN-Veh) |
|-----------------------------------------------------------|----------------------------------------------------|-----------------------------------------------|----------------------------------------------------|-----------------------------------------------|----------------------------------------------------|-----------------------------------------------|--------------------------------------------------------|---------------------------------------------------|-------------------------------------------------------|--------------------------------------------------|
| Gm25683                                                   | -2.33                                              | 0.022                                         | -1.31                                              | 0.325                                         | 1.49                                               | 0.066                                         | 1.06                                                   | 0.824                                             | -1.38                                                 | 0.004                                            |
| Ndrp1                                                     | -2.35                                              | 0.009                                         | -2.67                                              | 0.002                                         | 1.48                                               | 0.020                                         | -1.06                                                  | 0.357                                             | 1.41                                                  | 0.004                                            |
| Adck5                                                     | -2.40                                              | 0.026                                         | -1.88                                              | 0.001                                         | 1.64                                               | 0.076                                         | -1.06                                                  | 0.868                                             | 1.03                                                  | 0.511                                            |
| Gm26216                                                   | -2.40                                              | 0.034                                         | -1.08                                              | 0.550                                         | 1.63                                               | 0.023                                         | 1.40                                                   | 0.077                                             | -1.22                                                 | 0.335                                            |
| mt-Ty                                                     | -2.43                                              | 0.044                                         | -1.18                                              | 0.878                                         | 2.67                                               | 0.042                                         | -1.19                                                  | 0.935                                             | 1.31                                                  | 0.369                                            |
| Gm26293                                                   | -2.44                                              | 0.027                                         | -1.30                                              | 0.026                                         | 1.39                                               | 0.329                                         | 1.36                                                   | 0.338                                             | -1.15                                                 | 0.278                                            |
| Gm23579                                                   | -2.46                                              | 0.047                                         | -1.02                                              | 0.638                                         | 1.33                                               | 0.216                                         | -1.22                                                  | 0.711                                             | -1.11                                                 | 0.237                                            |
| Cyp1a2                                                    | -2.48                                              | 0.046                                         | -2.09                                              | 0.007                                         | 1.04                                               | 0.278                                         | -1.12                                                  | 0.189                                             | 1.14                                                  | 0.244                                            |
| Rps15a-ps5                                                | -2.51                                              | 0.033                                         | -1.26                                              | 0.355                                         | 1.65                                               | 0.132                                         | -1.11                                                  | 0.333                                             | -1.08                                                 | 0.602                                            |
| Gm25930                                                   | -2.52                                              | 0.037                                         | 1.63                                               | 0.042                                         | 2.23                                               | 0.048                                         | -1.16                                                  | 0.227                                             | 1.08                                                  | 0.846                                            |
| Gm22270                                                   | -2.54                                              | 0.012                                         | -2.30                                              | 0.151                                         | 1.15                                               | 0.883                                         | -1.13                                                  | 0.294                                             | 1.15                                                  | 0.244                                            |
| Gm24869                                                   | -2.55                                              | 0.006                                         | 1.10                                               | 0.861                                         | 1.47                                               | 0.033                                         | 1.17                                                   | 0.182                                             | -1.24                                                 | 0.035                                            |
| Adh6-ps1                                                  | -2.57                                              | 0.041                                         | -1.45                                              | 0.267                                         | 1.01                                               | 0.323                                         | -1.34                                                  | 0.029                                             | 1.34                                                  | 0.079                                            |
| Idi1;<br>Gm13502                                          | -2.63                                              | 0.043                                         | -1.80                                              | 0.045                                         | 1.44                                               | 0.141                                         | 1.46                                                   | 0.104                                             | 2.19                                                  | 0.002                                            |
| Fabp5;<br>Gm6166                                          | -2.64                                              | 0.005                                         | -3.11                                              | 0.029                                         | 1.22                                               | 0.422                                         | -1.05                                                  | 0.589                                             | 1.30                                                  | 0.073                                            |
| Fabp5;<br>Gm6166                                          | -2.77                                              | 0.009                                         | -2.52                                              | 0.024                                         | 1.28                                               | 0.412                                         | -1.02                                                  | 0.555                                             | 1.26                                                  | 0.075                                            |
| Fbxo21                                                    | -2.77                                              | 0.004                                         | -2.74                                              | 0.003                                         | 1.70                                               | 0.016                                         | 1.17                                                   | 0.207                                             | 1.03                                                  | 0.802                                            |
| Gm26330<br>;<br>LOC1010<br>55915;<br>Gm15501<br>;<br>Rps8 | -2.82                                              | 0.014                                         | -1.51                                              | 0.026                                         | 1.64                                               | 0.097                                         | -1.12                                                  | 0.244                                             | 1.01                                                  | 0.719                                            |
| Gm23344                                                   | -2.86                                              | 0.048                                         | -1.20                                              | 0.838                                         | 2.40                                               | 0.038                                         | 1.02                                                   | 0.838                                             | -1.15                                                 | 0.378                                            |
| Serpina1e                                                 | -2.87                                              | 0.013                                         | -1.35                                              | 0.126                                         | 1.06                                               | 0.327                                         | -1.86                                                  | 0.002                                             | 1.71                                                  | 0.015                                            |
| Gm23650<br>;<br>Nop56                                     | -2.92                                              | 0.017                                         | -1.65                                              | 0.044                                         | -1.12                                              | 0.538                                         | 1.07                                                   | 0.992                                             | 1.11                                                  | 0.092                                            |
| Slco2a1                                                   | -2.92                                              | 0.024                                         | -2.10                                              | 0.005                                         | -1.23                                              | 0.832                                         | -1.41                                                  | 0.004                                             | 1.86                                                  | 0.004                                            |

| Gene Symbol                                                       | Linear Fold Change<br>(UN in cohort 2 vs cohort 1) | ANOVA P value<br>(UN in cohort 2 vs cohort 1) | Linear Fold Change<br>(NN in cohort 2 vs cohort 1) | ANOVA P value<br>(NN in cohort 2 vs cohort 1) | Linear Fold Change<br>(UN in cohort 3 vs cohort 2) | ANOVA P value<br>(UN in cohort 3 vs cohort 2) | Linear Fold Change<br>(In cohort 3; UN-Veh vs. NN-Veh) | ANOVA P value<br>(In cohort 3; UN-Veh vs. NN-Veh) | Linear Fold Change<br>(In cohort 3; UN-TU vs. UN-Veh) | ANOVA P value<br>(In cohort 3; UN-TU vs. UN-Veh) |
|-------------------------------------------------------------------|----------------------------------------------------|-----------------------------------------------|----------------------------------------------------|-----------------------------------------------|----------------------------------------------------|-----------------------------------------------|--------------------------------------------------------|---------------------------------------------------|-------------------------------------------------------|--------------------------------------------------|
| Snora64;<br>Gm8842;<br>Gm8841;<br>Gm10420<br>;<br>Gm6139;<br>Rps2 | -2.98                                              | 0.012                                         | -2.10                                              | 0.147                                         | -1.09                                              | 0.688                                         | -1.30                                                  | 0.133                                             | 1.30                                                  | 0.169                                            |
| Scarna6                                                           | -3.01                                              | 0.043                                         | -1.08                                              | 0.405                                         | -1.04                                              | 0.869                                         | -1.69                                                  | 0.003                                             | 1.27                                                  | 0.085                                            |
| Tcf24                                                             | -3.07                                              | 0.007                                         | -1.15                                              | 0.224                                         | -1.08                                              | 0.721                                         | -1.94                                                  | 0.014                                             | 1.65                                                  | 0.213                                            |
| C8b                                                               | -3.08                                              | 0.050                                         | -1.81                                              | 0.002                                         | -1.39                                              | 0.621                                         | -2.34                                                  | 0.000                                             | 1.62                                                  | 0.028                                            |
| Gm25985                                                           | -3.11                                              | 0.011                                         | -1.35                                              | 0.135                                         | 1.68                                               | 0.064                                         | 1.03                                                   | 0.330                                             | 1.28                                                  | 0.992                                            |
| Snora15                                                           | -3.17                                              | 0.039                                         | -1.91                                              | 0.150                                         | 1.59                                               | 0.369                                         | -1.16                                                  | 0.190                                             | 1.04                                                  | 0.187                                            |
| Gm22155                                                           | -3.20                                              | 0.026                                         | 1.35                                               | 0.616                                         | 1.44                                               | 0.244                                         | -2.17                                                  | 0.056                                             | 1.19                                                  | 0.761                                            |
| Smad9                                                             | -3.33                                              | 0.019                                         | -1.48                                              | 0.034                                         | 1.02                                               | 0.844                                         | 1.27                                                   | 0.032                                             | -1.14                                                 | 0.221                                            |
| Cyp3a41<br>b;<br>Cyp3a41<br>a;<br>Cyp3a11;<br>Cyp3a16;<br>Cyp3a44 | -3.34                                              | 0.015                                         | -3.87                                              | 0.000                                         | 1.44                                               | 0.120                                         | 1.54                                                   | 0.009                                             | -1.55                                                 | 0.019                                            |
| Cyp3a41<br>b;<br>Cyp3a41<br>a;<br>Cyp3a11;<br>Cyp3a16;<br>Cyp3a44 | -3.40                                              | 0.015                                         | -3.99                                              | 0.000                                         | 1.49                                               | 0.111                                         | 1.57                                                   | 0.009                                             | -1.59                                                 | 0.018                                            |
| Snord12;<br>1500012<br>F01Rik                                     | -3.44                                              | 0.032                                         | 1.12                                               | 0.711                                         | 2.12                                               | 0.095                                         | 1.10                                                   | 0.716                                             | -1.19                                                 | 0.439                                            |
| Acmsd                                                             | -3.45                                              | 0.026                                         | 1.02                                               | 0.729                                         | 1.14                                               | 0.370                                         | -3.57                                                  | 0.000                                             | 1.63                                                  | 0.124                                            |

| Gene Symbol                                                             | Linear Fold Change<br>(UN in cohort 2 vs cohort 1) | ANOVA P value<br>(UN in cohort 2 vs cohort 1) | Linear Fold Change<br>(NN in cohort 2 vs cohort 1) | ANOVA P value<br>(NN in cohort 2 vs cohort 1) | Linear Fold Change<br>(UN in cohort 3 vs cohort 2) | ANOVA P value<br>(UN in cohort 3 vs cohort 2) | Linear Fold Change<br>(In cohort 3; UN-Veh vs. NN-Veh) | ANOVA P value<br>(In cohort 3; UN-Veh vs. NN-Veh) | Linear Fold Change<br>(In cohort 3; UN-TU vs. UN-Veh) | ANOVA P value<br>(In cohort 3; UN-TU vs. UN-Veh) |
|-------------------------------------------------------------------------|----------------------------------------------------|-----------------------------------------------|----------------------------------------------------|-----------------------------------------------|----------------------------------------------------|-----------------------------------------------|--------------------------------------------------------|---------------------------------------------------|-------------------------------------------------------|--------------------------------------------------|
| Cyp2c54                                                                 | -3.52                                              | 0.031                                         | -2.18                                              | 0.127                                         | -1.15                                              | 0.519                                         | -1.64                                                  | 0.020                                             | 1.30                                                  | 0.162                                            |
| Snord13                                                                 | -3.56                                              | 0.036                                         | -1.58                                              | 0.249                                         | 1.36                                               | 0.707                                         | 1.22                                                   | 0.812                                             | -1.23                                                 | 0.731                                            |
| Cyp4a12<br>a                                                            | -3.62                                              | 0.006                                         | -1.98                                              | 0.109                                         | -1.46                                              | 0.546                                         | -1.14                                                  | 0.564                                             | 1.19                                                  | 0.855                                            |
| Avpr1a                                                                  | -3.66                                              | 0.010                                         | -2.88                                              | 0.003                                         | 1.20                                               | 0.391                                         | -1.67                                                  | 0.002                                             | 2.47                                                  | 0.005                                            |
| Gm4450                                                                  | -3.71                                              | 0.010                                         | -1.15                                              | 0.156                                         | 1.28                                               | 0.533                                         | -1.22                                                  | 0.124                                             | 1.20                                                  | 0.150                                            |
| Igfbp2                                                                  | -3.75                                              | 0.002                                         | -3.82                                              | 0.002                                         | 1.53                                               | 0.040                                         | 1.01                                                   | 0.787                                             | -1.39                                                 | 0.002                                            |
| Gm24938<br>;Gm2325<br>6;Gm261<br>40;Gm22<br>707;Gm2<br>2908;Gm<br>25196 | -3.78                                              | 0.009                                         | -1.31                                              | 0.175                                         | 2.68                                               | 0.043                                         | -1.25                                                  | 0.320                                             | 1.23                                                  | 0.384                                            |
| Gm24938<br>;Gm2325<br>6;Gm261<br>40;Gm22<br>707;Gm2<br>2908;Gm<br>25196 | -3.78                                              | 0.009                                         | -1.31                                              | 0.175                                         | 2.68                                               | 0.043                                         | -1.25                                                  | 0.320                                             | 1.23                                                  | 0.384                                            |
| Gm24938<br>;Gm2325<br>6;Gm261<br>40;Gm22<br>707;                        | -3.78                                              | 0.009                                         | -1.31                                              | 0.175                                         | 2.68                                               | 0.043                                         | -1.25                                                  | 0.320                                             | 1.23                                                  | 0.384                                            |
| Chka                                                                    | -4.19                                              | 0.035                                         | -1.63                                              | 0.254                                         | 2.07                                               | 0.027                                         | -1.92                                                  | 0.004                                             | 1.61                                                  | 0.019                                            |
| Gm22036                                                                 | -4.37                                              | 0.013                                         | -2.49                                              | 0.012                                         | -1.16                                              | 0.575                                         | 1.01                                                   | 0.599                                             | 1.35                                                  | 0.124                                            |
| Gm15998                                                                 | -4.38                                              | 0.003                                         | -2.16                                              | 0.018                                         | 1.53                                               | 0.022                                         | 1.02                                                   | 0.370                                             | 2.03                                                  | 0.001                                            |
| Gm15611                                                                 | -4.40                                              | 0.012                                         | -5.41                                              | 0.001                                         | -1.06                                              | 0.872                                         | -1.34                                                  | 0.223                                             | 1.24                                                  | 0.230                                            |
| Cyp4a12<br>b                                                            | -4.47                                              | 0.003                                         | -1.95                                              | 0.130                                         | -1.41                                              | 0.552                                         | -1.48                                                  | 0.003                                             | -1.05                                                 | 0.531                                            |

| Gene Symbol                       | Linear Fold Change<br>(UN in cohort 2 vs cohort 1) | ANOVA P value<br>(UN in cohort 2 vs cohort 1) | Linear Fold Change<br>(NN in cohort 2 vs cohort 1) | ANOVA P value<br>(NN in cohort 2 vs cohort 1) | Linear Fold Change<br>(UN in cohort 3 vs cohort 2) | ANOVA P value<br>(UN in cohort 3 vs cohort 2) | Linear Fold Change<br>(In cohort 3; UN-Veh vs. NN-Veh) | ANOVA P value<br>(In cohort 3; UN-Veh vs. NN-Veh) | Linear Fold Change<br>(In cohort 3; UN-TU vs. UN-Veh) | ANOVA P value<br>(In cohort 3; UN-TU vs. UN-Veh) |
|-----------------------------------|----------------------------------------------------|-----------------------------------------------|----------------------------------------------------|-----------------------------------------------|----------------------------------------------------|-----------------------------------------------|--------------------------------------------------------|---------------------------------------------------|-------------------------------------------------------|--------------------------------------------------|
| Snord68;<br>Gm10071<br>; Rpl13    | -4.57                                              | 0.034                                         | 1.18                                               | 0.586                                         | 1.76                                               | 0.185                                         | 1.08                                                   | 0.406                                             | -1.05                                                 | 0.354                                            |
| Cdh1                              | -4.64                                              | 0.000                                         | -2.10                                              | 0.038                                         | 1.00                                               | 0.874                                         | -1.42                                                  | 0.027                                             | 1.67                                                  | 0.019                                            |
| Ces2a                             | -4.73                                              | 0.013                                         | -2.97                                              | 0.000                                         | 1.42                                               | 0.248                                         | -1.21                                                  | 0.003                                             | -1.20                                                 | 0.003                                            |
| Clec2h                            | -4.76                                              | 0.011                                         | -2.79                                              | 0.071                                         | 1.02                                               | 0.982                                         | -1.25                                                  | 0.099                                             | -1.57                                                 | 0.005                                            |
| Csad                              | -5.24                                              | 0.001                                         | -2.68                                              | 0.000                                         | 1.43                                               | 0.140                                         | -1.05                                                  | 0.769                                             | -1.33                                                 | 0.278                                            |
| Gm10717                           | -5.27                                              | 0.047                                         | -1.75                                              | 0.117                                         | 4.82                                               | 0.036                                         | 1.81                                                   | 0.245                                             | -1.08                                                 | 0.919                                            |
| Slco1a1                           | -5.85                                              | 0.005                                         | -1.76                                              | 0.030                                         | -3.00                                              | 0.199                                         | -2.84                                                  | 0.063                                             | 6.27                                                  | 0.005                                            |
| Cyp3a11                           | -6.41                                              | 0.000                                         | -5.87                                              | 0.000                                         | 1.72                                               | 0.037                                         | 1.66                                                   | 0.020                                             | -1.65                                                 | 0.044                                            |
| Hsd3b4;<br>Gm10681<br>;<br>Gm4450 | -6.82                                              | 0.000                                         | -2.47                                              | 0.025                                         | -1.10                                              | 0.152                                         | -1.38                                                  | 0.077                                             | 1.19                                                  | 0.149                                            |
| Hsd3b4;<br>Gm10681<br>;<br>Gm4450 | -6.82                                              | 0.000                                         | -2.47                                              | 0.025                                         | -1.10                                              | 0.152                                         | -1.38                                                  | 0.077                                             | 1.19                                                  | 0.149                                            |
| Cyp2c53-<br>ps                    | -7.19                                              | 0.000                                         | -1.71                                              | 0.195                                         | 1.04                                               | 0.306                                         | -1.17                                                  | 0.383                                             | 1.04                                                  | 0.992                                            |
| Selenbp2                          | -7.35                                              | 0.007                                         | -2.65                                              | 0.010                                         | -1.19                                              | 0.721                                         | -1.34                                                  | 0.027                                             | -1.15                                                 | 0.096                                            |
| Cyp2b10                           | -7.37                                              | 0.000                                         | -8.03                                              | 0.001                                         | 1.55                                               | 0.005                                         | 2.01                                                   | 0.002                                             | -1.57                                                 | 0.010                                            |
| Cyp2c55                           | -8.96                                              | 0.001                                         | -7.04                                              | 0.000                                         | 1.31                                               | 0.248                                         | -1.44                                                  | 0.244                                             | -1.17                                                 | 0.478                                            |
| Cyp3a44                           | -9.04                                              | 0.000                                         | -8.32                                              | 0.000                                         | 1.92                                               | 0.007                                         | 1.80                                                   | 0.010                                             | -1.91                                                 | 0.002                                            |
| Serpina4-<br>ps1                  | -10.54                                             | 0.001                                         | -5.72                                              | 0.010                                         | -1.78                                              | 0.272                                         | 1.41                                                   | 0.366                                             | 1.06                                                  | 0.559                                            |
| Gpr110                            | -14.78                                             | 0.000                                         | -10.71                                             | 0.001                                         | 1.03                                               | 0.452                                         | -1.14                                                  | 0.155                                             | 1.08                                                  | 0.597                                            |
| Hsd3b5                            | -85.44                                             | 0.000                                         | -3.80                                              | 0.026                                         | 1.62                                               | 0.462                                         | -1.65                                                  | 0.293                                             | 2.34                                                  | 0.044                                            |

**Supplemental Table S4. Cidea and Cidec expression over 9, 17, and 22 weeks**

Linear fold changes in Cidea and Cidec genes shown with the longitudinal time periods of cohorts 1, 2, and 3 with their ANOVA P values.

| Gene symbol | On week 9<br>Linear fold change (UN vs. NN) | ANOVA P value | On week 17<br>Linear fold change (UN vs. NN) | ANOVA P value | On week 22<br>Linear fold change (UN-Veh vs. NN-Veh) | ANOVA P value |
|-------------|---------------------------------------------|---------------|----------------------------------------------|---------------|------------------------------------------------------|---------------|
| Cidea       | 1.23                                        | 0.93          | 4.32                                         | 0.01          | 11.49                                                | 0.000         |
| Cidec       | -1.19                                       | 0.08          | 2.56                                         | 0.06          | 5.60                                                 | 0.000         |



### Supplemental Table S5. MBD sequencing at 22 weeks of age

Comparison of DNA methylation peaks among different groups; undernourishment *in utero* and normal nourishment *in utero* (cohort 3, UN-Veh vs. NN-Veh, n=4), undernourishment *in utero* with or without TUDCA (cohort 3, UN-TU vs. UN-Veh, n=4), and normal nourishment *in utero* with or without TUDCA (cohort 3, NN-TU vs. NN-Veh, n=4). Peaks detected include the overlapped promoter regions listed at the beginning (marked in blue) and the remainder of the genes. In UN-TU vs. UN-Veh, there was no significant methylation in the promoter region detected by MBD sequencing.

| Gene symbol              | Start     | End       | Fold changes (log2) | P value | Peak ID |
|--------------------------|-----------|-----------|---------------------|---------|---------|
| <b>UN-Veh vs. NN-Veh</b> |           |           |                     |         |         |
| Fktn                     | 53713923  | 53714857  | -3.51               | 0.000   | 130874  |
| Erdr1                    | 90772977  | 90802259  | 1.33                | 0.000   | 208985  |
| Mir466d                  | 5378645   | 5379769   | -1.29               | 0.000   | 102622  |
| Scoc                     | 83457938  | 83458821  | 0.87                | 0.000   | 185358  |
| Tmem194                  | 127663856 | 127665295 | -0.64               | 0.000   | 24804   |
| 1700012D01<br>Rik        | 127663856 | 127665295 | -0.64               | 0.000   | 24804   |
| Csrnp2                   | 100496429 | 100497267 | -0.95               | 0.000   | 72575   |
| Limd1                    | 123461518 | 123462569 | -2.08               | 0.000   | 202078  |
| Erdr1                    | 90802692  | 90808090  | 1.95                | 0.000   | 208986  |
| Gphn                     | 78350503  | 78351495  | -1.68               | 0.000   | 41785   |
| Mir6356                  | 68691649  | 68692774  | -1.11               | 0.000   | 94312   |
| Fktn                     | 53713923  | 53714857  | -3.51               | 0.000   | 130874  |
| Erdr1                    | 90772977  | 90802259  | 1.33                | 0.000   | 208985  |
| Filip11                  | 57390675  | 57392158  | -1.75               | 0.000   | 77037   |
| Mapk15                   | 75997085  | 75999367  | -1.00               | 0.000   | 68424   |
| Lamp1                    | 13153354  | 13153962  | 1.44                | 0.000   | 180149  |
| Plekha1                  | 130834036 | 130835035 | -1.65               | 0.000   | 177567  |
| Sun5                     | 153857417 | 153857946 | -1.57               | 0.000   | 112774  |
| Hic2                     | 17221798  | 17222962  | -0.94               | 0.000   | 74009   |
| Cacna1a                  | 84491624  | 84492385  | 1.37                | 0.000   | 185501  |
| Ins1                     | 52324565  | 52325252  | 1.57                | 0.000   | 101126  |
| Igsf9b                   | 91096307  | 91097106  | -1.24               | 0.000   | 78800   |
| Myl12b                   | 27323691  | 27324728  | -0.72               | 0.000   | 192758  |
| Cox10                    | 70963256  | 70965204  | -0.86               | 0.000   | 87181   |

| Gene symbol                   | Start     | End       | Fold changes (log2) | P value | Peak ID |
|-------------------------------|-----------|-----------|---------------------|---------|---------|
| Itsn1                         | 64071250  | 64072133  | -0.83               | 0.000   | 29445   |
| Ttll8                         | 173724053 | 173725043 | 0.87                | 0.000   | 116272  |
| Nus1                          | 91764508  | 91765415  | -0.99               | 0.000   | 78944   |
| Rtn4rl1                       | 88945800  | 88946557  | 0.91                | 0.000   | 70606   |
| Prss39                        | 52450644  | 52451736  | -0.61               | 0.000   | 16889   |
| Cltc                          | 75263348  | 75267535  | -0.27               | 0.000   | 30641   |
| Mir3472                       | 34499858  | 34500431  | 1.12                | 0.000   | 1533    |
| Speer4d                       | 49526773  | 49527401  | -1.07               | 0.000   | 92408   |
| Fmn2                          | 86773101  | 86773860  | 1.29                | 0.000   | 31900   |
| Myrf                          | 145044789 | 145046357 | -1.26               | 0.000   | 205497  |
| P4ha2                         | 118946071 | 118946734 | 1.09                | 0.000   | 150968  |
| Mir6978                       | 15606440  | 15607483  | 1.42                | 0.000   | 142099  |
| Pocla                         | 174520606 | 174521211 | 1.21                | 0.000   | 11097   |
| Vmn2r120                      | 10268516  | 10270081  | -0.55               | 0.000   | 97521   |
| AI464131                      | 54105997  | 54106660  | 1.41                | 0.000   | 28368   |
| Amotl1                        | 57213574  | 57214106  | -1.08               | 0.000   | 85968   |
| Cnp                           | 106293344 | 106294510 | 0.75                | 0.000   | 199526  |
| Fam163a                       | 57587766  | 57588662  | -1.53               | 0.000   | 86001   |
| Arpc3                         | 41505150  | 41506074  | 0.84                | 0.000   | 129644  |
| Pdf                           | 14638799  | 14639573  | 1.18                | 0.000   | 191856  |
| Gm13498                       | 100563210 | 100566194 | -0.40               | 0.000   | 33574   |
| Glb1l2                        | 156199742 | 156200510 | 1.30                | 0.000   | 9687    |
| Mdm2                          | 122397373 | 122398768 | 0.79                | 0.000   | 151644  |
| Tnfrsf19                      | 107047828 | 107049043 | -0.86               | 0.000   | 187437  |
| Herc2                         | 50913289  | 50914126  | 1.02                | 0.000   | 106022  |
| Tmtc1                         | 82770658  | 82773093  | 0.56                | 0.000   | 174165  |
| Wwc2                          | 26828587  | 26829231  | 1.16                | 0.000   | 192712  |
| Panx1                         | 117689249 | 117689782 | 1.13                | 0.000   | 23223   |
| Scoc                          | 61087221  | 61087866  | 1.33                | 0.000   | 59999   |
| Zfp536                        | 56099667  | 56100691  | -0.58               | 0.000   | 172137  |
| E2f7                          | 148464874 | 148465508 | 1.36                | 0.000   | 167034  |
| Erdr1                         | 47972783  | 47973702  | -1.02               | 0.000   | 183204  |
| Vmn1r142                      | 9063359   | 9063912   | 1.34                | 0.000   | 117416  |
| Mydgf                         | 15068103  | 15068714  | -0.98               | 0.000   | 191916  |
| Irgc1                         | 83457938  | 83458821  | 0.87                | 0.000   | 185358  |
| Hist1h4m;L<br>OC1026412<br>29 | 37778331  | 37778777  | 1.28                | 0.000   | 170789  |
| Foxk2                         | 110651808 | 110652615 | 1.12                | 0.000   | 22490   |
| Rab28                         | 90808276  | 90809476  | 1.55                | 0.000   | 208987  |

| Gene symbol             | Start     | End       | Fold changes (log2) | P value | Peak ID |
|-------------------------|-----------|-----------|---------------------|---------|---------|
| 9530036O11 Rik          | 22151637  | 22153334  | 1.52                | 0.000   | 168642  |
| Amy2a1                  | 56186539  | 56191565  | -0.27               | 0.000   | 85794   |
| Csrnp2                  | 108680192 | 108680649 | 1.09                | 0.000   | 134244  |
| Olfrl298                | 24434537  | 24435083  | 1.19                | 0.000   | 168827  |
| Kctd1                   | 21812408  | 21820580  | 0.87                | 0.000   | 47234   |
| Mpp7                    | 96105776  | 96106927  | 0.86                | 0.000   | 71576   |
| Dab1                    | 121296510 | 121297360 | -0.92               | 0.000   | 37034   |
| Tmem30c                 | 41342063  | 41342994  | 0.81                | 0.000   | 144024  |
| Htt                     | 28436496  | 28437466  | -0.62               | 0.000   | 142919  |
| Tns1                    | 113568021 | 113568594 | -1.25               | 0.000   | 124188  |
| Pik3c3                  | 100496429 | 100497267 | -0.95               | 0.000   | 72575   |
| Zbtb25                  | 26388173  | 26389546  | 0.93                | 0.000   | 142865  |
| Azi2                    | 111649428 | 111650657 | -0.62               | 0.000   | 109971  |
| <b>UN-TU vs. UN-Veh</b> |           |           |                     |         |         |
| Cyp2b19                 | 26776391  | 26777360  | -1.16               | 0.000   | 169166  |
| Rfk                     | 17474718  | 17475180  | 1.38                | 0.000   | 97943   |
| Endov                   | 119507005 | 119507862 | 1.20                | 0.000   | 36723   |
| Brcal                   | 101521267 | 101521731 | 1.52                | 0.000   | 33747   |
| Mir187                  | 24426219  | 24427033  | 1.22                | 0.000   | 90825   |
| Phf20                   | 156253676 | 156254360 | 1.37                | 0.000   | 113058  |
| Parvb                   | 84248490  | 84249651  | 0.97                | 0.000   | 69875   |
| 4930401O10 Rik          | 71976540  | 71977735  | 0.97                | 0.000   | 30343   |
| Oprm1                   | 6630223   | 6631046   | 1.77                | 0.000   | 13842   |
| Efl1                    | 82693038  | 82693906  | 1.17                | 0.000   | 174149  |
| Epg5                    | 77932919  | 77933508  | 1.37                | 0.000   | 95435   |
| Aebp2                   | 140606177 | 140606873 | 1.45                | 0.000   | 165984  |
| Tmem50a                 | 134894341 | 134895234 | 0.98                | 0.000   | 137289  |
| Erlin1                  | 44076286  | 44077152  | 1.08                | 0.000   | 100279  |
| Ntrk2                   | 59130975  | 59131904  | 1.20                | 0.000   | 51280   |
| St8sia1                 | 143001453 | 143002324 | -1.00               | 0.000   | 166223  |
| Tex29                   | 12057066  | 12057862  | -1.01               | 0.000   | 179928  |
| Adcy7                   | 88265024  | 88265737  | 1.18                | 0.000   | 185901  |
| <b>NN-TU vs. NN-Veh</b> |           |           |                     |         |         |
| Mir101c                 | 2999847   | 3038796   | -0.52               | 0.000   | 191357  |
| Gm32511                 | 71168994  | 71169960  | 1.12                | 0.000   | 196740  |
| Pop5                    | 115233364 | 115234316 | 1.08                | 0.000   | 150128  |
| Ccl3                    | 83649639  | 83650036  | -1.17               | 0.000   | 31589   |
| Ehmt1                   | 24920489  | 24921215  | 1.06                | 0.000   | 103685  |

| Gene symbol | Start     | End       | Fold changes (log2) | P value | Peak ID |
|-------------|-----------|-----------|---------------------|---------|---------|
| Mettl24     | 40680593  | 40681422  | 1.06                | 0.000   | 16028   |
| Mrpl12      | 120482602 | 120483553 | 0.86                | 0.000   | 36908   |
| Coll1a2     | 34038355  | 34039187  | 1.17                | 0.000   | 83676   |
| Gpx4        | 80047171  | 80048215  | 0.88                | 0.000   | 19810   |
| Mir6408     | 60921682  | 60922428  | 1.03                | 0.000   | 17536   |
| Lonp2       | 86609518  | 86610264  | 1.42                | 0.000   | 185716  |
| Dgki        | 37270029  | 37270769  | 1.40                | 0.000   | 158343  |
| Ptk7        | 46618627  | 46620070  | 0.85                | 0.000   | 84834   |
| Mir1967     | 124043846 | 124044484 | 2.10                | 0.000   | 190670  |
| Smim20      | 53283494  | 53284109  | 1.59                | 0.000   | 144581  |
| Tmem200a    | 26126677  | 26127471  | -1.29               | 0.000   | 15424   |
| Mir6956     | 78987169  | 78988916  | 0.70                | 0.000   | 68954   |
| Fam209      | 172490372 | 172491354 | 1.26                | 0.000   | 115962  |
| Mir763      | 120427044 | 120427733 | 1.43                | 0.000   | 23808   |
| Mir1249     | 84942340  | 84943269  | 1.37                | 0.000   | 70043   |
| Saa4        | 46730472  | 46731548  | 1.14                | 0.000   | 171671  |
| Has3        | 106806729 | 106807291 | 1.47                | 0.000   | 187404  |
| Rgs9        | 109271003 | 109271997 | 1.15                | 0.000   | 34861   |
| Zfp827      | 79050577  | 79051269  | 1.36                | 0.000   | 185073  |
| Clint1      | 45893554  | 45894537  | 1.20                | 0.000   | 27563   |
| Pex5l       | 33121242  | 33121769  | 1.48                | 0.000   | 118777  |
| Aqp9        | 71168994  | 71169960  | 1.12                | 0.000   | 196740  |
| Cbr4        | 61624787  | 61625524  | 1.50                | 0.000   | 183939  |
| Gm16675     | 46716300  | 46717031  | 1.32                | 0.000   | 182948  |
| Ice1        | 70647742  | 70648635  | 1.21                | 0.000   | 52221   |
| Cog2        | 124534967 | 124535890 | 1.15                | 0.000   | 190781  |
| Nat3        | 67540556  | 67540992  | -1.30               | 0.000   | 184175  |
| Tmem132d    | 128263334 | 128264130 | 1.31                | 0.000   | 152556  |
| Kdr         | 75980708  | 75981433  | 1.32                | 0.000   | 146235  |
| Ppp2r1b     | 50827497  | 50828392  | 1.12                | 0.000   | 194738  |
| 1700011H14  |           |           |                     |         |         |
| Rik         | 49215133  | 49215794  | -1.36               | 0.000   | 58972   |
| Nfyb        | 82739941  | 82740638  | 1.36                | 0.000   | 20211   |
| Rassf4      | 116690563 | 116691483 | -2.97               | 0.000   | 163555  |
| Lig3        | 82812190  | 82813510  | 0.96                | 0.000   | 31503   |
| Lgil        | 38251809  | 38253339  | -0.48               | 0.000   | 99551   |
| Zcchc14     | 121639125 | 121640176 | 0.93                | 0.000   | 190044  |
| Paxip1      | 27789197  | 27790082  | 1.01                | 0.000   | 142898  |
| Golga5      | 102471863 | 102472754 | -0.82               | 0.000   | 43882   |
| Grm3        | 9661632   | 9662356   | 1.45                | 0.000   | 141855  |

| Gene symbol       | Start     | End       | Fold changes (log2) | P value | Peak ID |
|-------------------|-----------|-----------|---------------------|---------|---------|
| E2f8              | 48886514  | 48887458  | 0.97                | 0.000   | 171802  |
| Kl                | 150954865 | 150956220 | 0.87                | 0.000   | 156286  |
| Pnliprp2          | 58771516  | 58772483  | -0.93               | 0.000   | 102214  |
| Vdr               | 97922625  | 97923149  | 1.48                | 0.000   | 72053   |
| Dock4             | 40648269  | 40649080  | -1.47               | 0.000   | 39484   |
| Urad              | 147334650 | 147335220 | 1.43                | 0.000   | 155570  |
| Elk3              | 93320808  | 93321551  | 1.26                | 0.000   | 21334   |
| Pglyrp2           | 32415476  | 32417523  | -0.50               | 0.000   | 83528   |
| Neurl2            | 164836228 | 164840868 | 0.26                | 0.000   | 114170  |
| Filip1l           | 57468236  | 57469266  | -0.83               | 0.000   | 77052   |
| Gpm6a             | 55371958  | 55375280  | 2.64                | 0.000   | 183591  |
| 4930579H20<br>Rik | 27254379  | 27255662  | -1.07               | 0.000   | 15484   |
| Stpg2             | 139254565 | 139255511 | -0.80               | 0.000   | 126188  |
| Atf1              | 100169937 | 100170705 | 1.00                | 0.000   | 72497   |
| Ankrd55           | 112281560 | 112282413 | 1.29                | 0.000   | 55226   |
| Muc1              | 89231493  | 89232546  | 0.97                | 0.000   | 122243  |
| Nxpe2             | 47955807  | 47956426  | -1.26               | 0.000   | 194429  |
| Csf2ra            | 61232582  | 61233568  | -0.68               | 0.000   | 102362  |
| Speer4d           | 15606440  | 15607483  | 1.51                | 0.000   | 142099  |
| Gng4              | 13753224  | 13754188  | -2.41               | 0.000   | 46867   |
| 1700112J05<br>Rik | 77038245  | 77039191  | 0.99                | 0.000   | 146401  |
| Cdh26             | 178468052 | 178469058 | 1.15                | 0.000   | 116610  |
| Inpp4b            | 81406429  | 81407379  | -1.02               | 0.000   | 185261  |
| Gm20594           | 79657458  | 79658820  | -0.92               | 0.000   | 160736  |
| Ccm2l             | 153083411 | 153084012 | 1.32                | 0.000   | 112675  |
| Rims2             | 39244399  | 39245696  | 1.66                | 0.000   | 66576   |
| Tbxas1            | 38774301  | 38775198  | -1.03               | 0.000   | 158513  |
| Cdh15             | 122858948 | 122859824 | 0.99                | 0.000   | 190376  |
| Nfkbiz            | 55813667  | 55814728  | 0.83                | 0.000   | 76903   |
| Rusc1             | 89087685  | 89088529  | 1.37                | 0.000   | 122218  |
| Glo1              | 30603496  | 30604566  | 0.81                | 0.000   | 83166   |
| Slc39a8           | 135963426 | 135963995 | -0.97               | 0.000   | 125898  |
| Lym9              | 78852359  | 78852915  | 1.13                | 0.000   | 31102   |
| 4930432M1<br>7Rik | 121672731 | 121673505 | 1.10                | 0.000   | 124651  |
| 5930412G12<br>Rik | 128544030 | 128544732 | 1.11                | 0.000   | 152598  |
| Edn1              | 42322847  | 42323587  | 1.09                | 0.000   | 48649   |

| Gene symbol        | Start     | End       | Fold changes (log2) | P value | Peak ID |
|--------------------|-----------|-----------|---------------------|---------|---------|
| Zfp365             | 67924945  | 67925983  | -0.75               | 0.000   | 18319   |
| Polr3c             | 96775398  | 96776162  | 1.05                | 0.000   | 122900  |
| Sim2               | 94056372  | 94057324  | 0.96                | 0.000   | 79453   |
| Gm4246;<br>Tmem14c | 41019014  | 41020539  | 0.78                | 0.000   | 48493   |
| Sepp1              | 3169128   | 3170602   | 1.46                | 0.000   | 64177   |
| Krr1               | 111931934 | 111932510 | 1.11                | 0.000   | 22669   |
| Ajap1              | 153425976 | 153426968 | 0.92                | 0.000   | 140778  |
| Unc5d              | 29559378  | 29560028  | 1.26                | 0.000   | 181843  |
| Olfir92            | 37105458  | 37106417  | -0.66               | 0.000   | 84046   |
| Itpkc              | 27216753  | 27217566  | 1.01                | 0.000   | 169210  |
| Ebf3               | 137230719 | 137231586 | -0.67               | 0.000   | 178313  |
| Picalm             | 90167394  | 90168160  | 1.01                | 0.000   | 174448  |
| Scaf4              | 90312435  | 90313347  | 0.98                | 0.000   | 78606   |
| A930005H1<br>ORik  | 115895910 | 115896434 | 1.13                | 0.000   | 124260  |
| Ces5a              | 93525203  | 93525800  | -1.00               | 0.000   | 186468  |
| Mest               | 30726879  | 30727925  | 2.55                | 0.000   | 157824  |
| Dhx37              | 125415889 | 125416875 | 0.81                | 0.000   | 152297  |
| Slc35d1            | 103226101 | 103227316 | 0.79                | 0.000   | 133641  |
| E2f7               | 110741848 | 110742682 | 1.03                | 0.000   | 22503   |
| Secisbp2l          | 125760518 | 125761345 | 1.06                | 0.000   | 110931  |
| Mark2              | 7352650   | 7353545   | 1.06                | 0.000   | 97273   |
| Srgap1             | 121968457 | 121969213 | 1.03                | 0.000   | 24156   |
| Sipa111            | 82280692  | 82281622  | -0.87               | 0.000   | 42169   |
| Twsg1              | 65957908  | 65958395  | 1.11                | 0.000   | 86557   |
| Lypd6              | 50004667  | 50005472  | -1.06               | 0.000   | 105980  |
| Lrrc47             | 154006800 | 154007827 | 0.79                | 0.000   | 140921  |
| Scd2               | 44271969  | 44272721  | 1.22                | 0.000   | 100310  |
| Adrb2              | 62118059  | 62119018  | 0.99                | 0.000   | 93511   |
| Twist2             | 91752715  | 91753984  | 0.66                | 0.000   | 5901    |
| Mfsd9              | 40784103  | 40785048  | 0.90                | 0.000   | 2424    |
| Gbp9               | 105112996 | 105114090 | -0.58               | 0.000   | 148553  |
| Cog7               | 121958959 | 121959417 | 1.34                | 0.000   | 176556  |
| Fbln7              | 128853038 | 128853544 | 1.18                | 0.000   | 111244  |
| Arl15              | 113919891 | 113920794 | 0.88                | 0.000   | 55500   |
| Kcnk2              | 189492141 | 189493136 | -0.67               | 0.000   | 12940   |
| Spata18            | 73703668  | 73704650  | 0.76                | 0.000   | 145902  |
| Ank3               | 69693812  | 69694533  | 1.02                | 0.000   | 18562   |
| Psmg4              | 34165380  | 34167711  | 0.65                | 0.000   | 47985   |

| Gene symbol | Start     | End       | Fold changes<br>(log2) | P value | Peak ID |
|-------------|-----------|-----------|------------------------|---------|---------|
| Cand1       | 119191369 | 119192107 | 1.28                   | 0.000   | 23525   |

### Supplemental Table S6. Summary of 7 GOIs and their biological relevance.

Biological relevance of 7 GOIs was reviewed and briefly discussed below with corresponding citations.

| Gene Symbol | Biological Function                                                                                                                                                                                                 |
|-------------|---------------------------------------------------------------------------------------------------------------------------------------------------------------------------------------------------------------------|
| Rgs16       | Regulator of G Protein Signaling has been reported to be related with the onset of diabetes and play a role in hepatic fatty acid oxidation <sup>1</sup> .                                                          |
| Themis      | Thymocyte Selection Associated gene is reported to plays a central role in late thymocyte development by controlling both positive and negative T-cell selection <sup>2</sup> .                                     |
| Ifi2712b    | Interferon alpha-inducible protein 27-like protein 2B is involved in apoptotic pathways <sup>3</sup> .                                                                                                              |
| Cyp17a1     | Cytochrome P450 Family 17 Subfamily A Member 1 is reported to be actively involved in pathways like oxidative stress which is likely to play a keen role in development of hepatic steatosis <sup>4</sup> .         |
| Sprr1a      | Small Proline Rich Protein 1A, a Protein Coding gene. Among its related pathways are developmental biology and keratinization involved in structural molecule activity and protein binding, bridging <sup>5</sup> . |
| Ly6d        | Lymphocyte antigen 6D is a B-cell marker at early stage of development <sup>6</sup> .                                                                                                                               |
| Orm3        | Orsomucoid subunit 3 is known as immune-modulator was reported to be expressed in adipocytes. Orm-3 was reported to integrate inflammatory and metabolic signals to preserve energy homeostasis <sup>7</sup> .      |

1 Pashkov, V. *et al.* Regulator of G protein signaling (RGS16) inhibits hepatic fatty acid oxidation in a carbohydrate response element-binding protein (ChREBP)-dependent manner. *J Biol Chem* 286, 15116-15125 (2011).

2 Kakugawa, K. *et al.* A novel gene essential for the development of single positive thymocytes. *Mol Cell Biol* 29, 5128-5135 (2009).

3 Lu, M. Y. & Liao, F. Interferon-stimulated gene ISG12b2 is localized to the inner mitochondrial membrane and mediates virus-induced cell death. *Cell Death Differ* 18, 925-



936 (2011).

4 Liu, Y. *et al.* The role of cytochrome P450 in nonalcoholic fatty liver induced by high-fat diet: a gene expression profile analysis. *Zhonghua Gan Zang Bing Za Zhi* 25, 285-290 (2017).

5 Gibbs S. *et al.* Molecular characterization and evolution of the SPRR family of keratinocyte differentiation markers encoding small proline-rich proteins. *Genomics* 16 (3), 630-7 (1993).

6 Inlay, M. A. *et al.* Ly6d marks the earliest stage of B-cell specification and identifies the branchpoint between B-cell and T-cell development. *Genes Dev* 23, 2376-2381 (2009).

7 Lee, Y. S. *et al.* Adipocytokine orosomucoid integrates inflammatory and metabolic signals to preserve energy homeostasis by resolving immoderate inflammation. *J Biol Chem* 285, 22174-22185 (2010).

**Supplemental Table S7. List of antibodies**

List of specific antibodies used in immunohistochemistry and real-time quantitative PCR for Chromatin Immuno Precipitation (ChIP) assays in the vicinity of the Cidea and Cidec genes with supplier names.

| Name of the antibody                                       | Supplier                                     | Cat no.    | Clone no.  |
|------------------------------------------------------------|----------------------------------------------|------------|------------|
| <b>For immunohistochemistry</b>                            |                                              |            |            |
| Cide-a antibody                                            | Novus Biologicals, USA                       | NBP1-76950 | Polyclonal |
| Cide-c antibody                                            | Bioss Antibodies Inc.,<br>Massachusetts, USA | Bs-6796R   | Polyclonal |
| <b>For ChIP assays</b>                                     |                                              |            |            |
| Anti-histone H3 (di methyl K4) antibody [Y47] - ChIP grade | Abcam, Cambridge, MA, USA                    | ab 32356   | Monoclonal |
| Anti-monomethyl-Histone H3 (Lys9) Antibody                 | Merck, Germany                               | #07-450    | Polyclonal |
| Anti-dimethyl-histone H3 (Lys9) antibody                   | Merck, Germany                               | #07-441    | Polyclonal |
| Anti-tri-methyl-Histone H3 (Lys9) antibody                 | Merck, Germany.                              | #07-442    | Polyclonal |
| Anti-histone H3 (tri methyl K9) antibody - ChIP Grade      | Abcam, Cambridge, MA, USA                    | ab8898     | Polyclonal |
| Anti-acetyl H3 (Lys9) antibody                             | Merck, Germany                               | #07-352    | Polyclonal |
| Anti-histone H3 (mono methyl K36) antibody - ChIP Grade    | Abcam, Cambridge, MA, USA                    | ab 9048    | Polyclonal |
| Anti-histone H3 (di-methyl K36) antibody- ChIP grade       | Abcam, Cambridge, MA, USA                    | ab 9049    | Polyclonal |
| Anti-monomethyl-Histone H3 (Lys27) antibody                | Merck, Germany                               | #07-448    | Polyclonal |
| Anti-histone H3 (di-methyl K27) antibody- ChIP grade       | Abcam, Cambridge, MA, USA                    | ab 24684   | Polyclonal |

| Name of the antibody                                   | Supplier                               | Cat no. | Clone no.  |
|--------------------------------------------------------|----------------------------------------|---------|------------|
| Anti-tri-methyl-histone H3 (Lys27) antibody            | Merck, Germany                         | #07-449 | Polyclonal |
| Anti-histone H3 (tri-methyl K27) antibody - ChIP Grade | Abcam, Cambridge, MA, USA              | ab6002  | Monoclonal |
| Anti-acetyl-histone H4 antibody                        | Merck, Germany                         | #06-598 | Polyclonal |
| Anti-histone H4 (tri-methyl K20) antibody - ChIP Grade | Abcam, Cambridge, MA, USA              | ab9053  | Polyclonal |
| Normal Rabbit IgG as a control                         | CST (Cell Signaling Technology), Japan | #2729   | Polyclonal |

**Supplemental Table S8. List of primers**

List of oligonucleotide primers used in real-time quantitative PCR (qPCR) and Chromatin Immuno Precipitation (ChIP) assays in the vicinity of the Cidea and Cidec genes in mouse liver tissue.

| Name                                                 | Sequence                   | Supplier                   |
|------------------------------------------------------|----------------------------|----------------------------|
| Cidea primer (approximate region) - 2000 forward     | ACTTTCTCCCTCCTCTTCC<br>A   | Fasmac Co.,<br>Ltd., Japan |
| Cidea primer (approximate region) - 2000 reverse     | GTCATGCAGACTTGAAAG<br>CA   | Fasmac Co.,<br>Ltd., Japan |
| Cidea primer (approximate region) - 1000 forward     | CATTATTCCAGCCCTGAGA<br>CA  | Fasmac Co.,<br>Ltd., Japan |
| Cidea primer (approximate region) - 1000 reverse     | CCTCCAAGCTCACAGATA<br>GAGA | Fasmac Co.,<br>Ltd., Japan |
| Cidea primer (approximate region) - 500 forward      | CACTGGGAAACTGCTTTT<br>AGC  | Fasmac Co.,<br>Ltd., Japan |
| Cidea primer (approximate region) - 500 reverse      | GGAGTTGCTAGTTTTCTGC<br>TCA | Fasmac Co.,<br>Ltd., Japan |
| Cidea primer (approximate region) +1 forward         | GCTTCTCTACTGCCAAGCC<br>ATA | Fasmac Co.,<br>Ltd., Japan |
| Cidea primer (approximate region) +1 reverse         | CAGGATTTGGTGATGTTGG<br>TG  | Fasmac Co.,<br>Ltd., Japan |
| Cidea primer (approximate region) +1000 forward      | GCTAAGGCAAGAGACTTG<br>GAGA | Fasmac Co.,<br>Ltd., Japan |
| Cidea primer (approximate region) +1000 reverse      | TATAGGGAGGCCCTGTATG<br>TCT | Fasmac Co.,<br>Ltd., Japan |
| Cidea primer (approximate region) +2000 forward      | ATGGGAACATCCTTGCGTC<br>T   | Fasmac Co.,<br>Ltd., Japan |
| Cidea primer (approximate region) +2000 reverse      | CAAGGGAGGGAGTCATAG<br>ATCA | Fasmac Co.,<br>Ltd., Japan |
| Cidea primer (approximate region) +5000 forward      | ACCTGTGTACCACCTCAG<br>GATA | Fasmac Co.,<br>Ltd., Japan |
| Cidea primer (approximate region) +5000 reverse      | CCATATAGCACAGCAGGA<br>CAGA | Fasmac Co.,<br>Ltd., Japan |
| Cidea primer (approximate region) Over +5000 forward | AGTTTCCTTCAACCTGGG<br>AAC  | Fasmac Co.,<br>Ltd., Japan |
| Cidea primer (approximate region) Over +5000 reverse | GCAGAGTTTTCCAGGAAT<br>GG   | Fasmac Co.,<br>Ltd., Japan |
| Cidec primer (approximate region) - 2000 forward     | ACTCAATGGGTCATCTTGC<br>TG  | Fasmac Co.,<br>Ltd., Japan |
| Cidec primer (approximate region) - 2000 reverse     | CTAATTCAAGACAAGCCT<br>GAGC | Fasmac Co.,<br>Ltd., Japan |
|                                                      |                            |                            |

| Name                                                 | Sequence                   | Supplier                   |
|------------------------------------------------------|----------------------------|----------------------------|
| Cidec primer (approximate region) - 1000 forward     | GAATTCATTCCCCATGCTC<br>TT  | Fasmac Co.,<br>Ltd., Japan |
| Cidec primer (approximate region) - 1000 reverse     | CCAGGCTTCCCTCCATTTT<br>AT  | Fasmac Co.,<br>Ltd., Japan |
| Cidec primer (approximate region) - 500 forward      | ATGACACAAGCTGTACCA<br>CAGG | Fasmac Co.,<br>Ltd., Japan |
| Cidec primer (approximate region) - 500 reverse      | GCTCACATGCCTGTTTTCC<br>T   | Fasmac Co.,<br>Ltd., Japan |
| Cidec primer (approximate region) +1 forward         | CCTGAGACAGGGACAAAT<br>CAGT | Fasmac Co.,<br>Ltd., Japan |
| Cidec primer (approximate region) +1 reverse         | GCCTCACTCACTCCATTGT<br>TT  | Fasmac Co.,<br>Ltd., Japan |
| Cidec primer (approximate region) +1000 forward      | CACCATTGTGGTTCCTGTC<br>AT  | Fasmac Co.,<br>Ltd., Japan |
| Cidec primer (approximate region) +1000 reverse      | CTTGCCAGTTTCCCCATCT<br>AT  | Fasmac Co.,<br>Ltd., Japan |
| Cidec primer (approximate region) +2000 forward      | ACAGAGAAACCCTGTCTC<br>GAA  | Fasmac Co.,<br>Ltd., Japan |
| Cidec primer (approximate region) +2000 reverse      | TCACTTGACCATGTCACCT<br>CTC | Fasmac Co.,<br>Ltd., Japan |
| Cidec primer (approximate region) +5000 forward      | CCTCATCCCACAAATAAAC<br>ACA | Fasmac Co.,<br>Ltd., Japan |
| Cidec primer (approximate region) +5000 reverse      | ACCACCCTATTCCAACAAT<br>CC  | Fasmac Co.,<br>Ltd., Japan |
| Cidec primer (approximate region) Over +5000 forward | TTCTGAGTTCGAAGCCAG<br>TCT  | Fasmac Co.,<br>Ltd., Japan |
| Cidec primer (approximate region) Over +5000 reverse | TTTCGAGACAGGGTTTCT<br>CTG  | Fasmac Co.,<br>Ltd., Japan |
